# Supplementary material for: Identification of abscission checkpoint bodies as structures that regulate ESCRT factors to control abscission timing
Source: eLife. 2021 Aug 4;10:e63743. doi: 10.7554/eLife.63743 (PMC8437436; doi:10.7554/eLife.63743)
Supplement: Figure 1—source data 1. [file elife-63743-fig1-data1.xlsx]

## Sheet: Panel C
			Western Blots shown in Figure 1C (HeLa Lanes)

## Sheet: Panel D
													%Midbody-stage Cells
				siControl											siNups											siNups + AurBi
	Hours post-thymidine			Replicate #1	#2	#3	#4	#5	#6	#7	#8	#9	#10	#11	Replicate #1	#2	#3	#4	#5	#6	#7	#8	#9	#10	#11	Replicate #1	#2	#3	#4	#5
			10 hours					9	18	8				21					4	15	8				6
			11 hours	31	35	12	26	14	21	43	37	25	45	32	35	36	8	27	8	12	19	31	40	45	16
			12 hours	28	21	29	27	40	23	25	35	33	31	25	40	55	27	40	43	43	42	49	43	57	32
			13 hours	12	17	25	18	19	17	22	31	14	18	36	65	61	37	65	45	42	64	56	50	72	43
			14 hours	11	7	20	15	13	11	11	20	9	13	25	68	72	51	72	64	37	66	70	57	79	73
			15 hours	6	4	11	7				9	5	6	16	72	72	54	78				63	78	89	77	73
			16 hours	2	4	10	5					2	4	10	77	71	65	78				78	81	87	74	15	12	11	15	8

## Sheet: Supplement 1A
		%Midbody-stage cells with lagging chromatin
				siCon	siNups
			Replicate #1	2	2
			#2	2	2
			#3	4	1

## Sheet: Supplement 1B
				%Midbody-stage cells with lagging chromatin
				siControl			siNups
	Hours post-thymidine			Replicate #1	#2	#3	Replicate #1	#2	#3
			10	1	2	4	2	4	7
			11	0	2	3	1	3	6
			12	1	1	4	1	8	5
			13	3	2	5	3	6	5
			14	7	7	7	3	10	4
			15	1	5	4	9	3	9
			16	6	16	6	2	2	9
