# Supplementary material for: Identification of abscission checkpoint bodies as structures that regulate ESCRT factors to control abscission timing
Source: eLife. 2021 Aug 4;10:e63743. doi: 10.7554/eLife.63743 (PMC8437436; doi:10.7554/eLife.63743)
Supplement: Figure 2—source data 1. [file elife-63743-fig2-data1.xlsx]

## Sheet: Panel B
					%Early Midbodies with CEP55 Present
				siControl			siNups
		Hours post-thymidine		Replicate #1	#2	#3	Replicate #1	#2	#3
			10 hours	100	96	96	97	97	95
			11 hours	98	97	90	92	94	96
			12 hours	97	100	94	96	99	95
			13 hours	99	97	88	92	99	92
			14 hours	91	100	81	85	97	87

## Sheet: Panel D
					%Early Midbodies with ALIX Present
				siControl			siNups
		Hours post-thymidine		Replicate #1	#2	#3	Replicate #1	#2	#3
			11 hours	62	54	42	6	5	7
			12 hours	63	63	62	13	3	7
			13 hours	70	74	72	9	11	9
			14 hours	75	61	60	24	25	17
			15 hours	86	80	51	44	43	24
			16 hours	57	64	87	76	76	67

## Sheet: Panel F
			ALIX: CEP55 Relative Intensity at Early Midbodies
			11 hours post-thymidine		16 h post-thymidine
			siControl	siNups	siControl	siNups
			Replicate #1	Replicate #1	Replicate #1	Replicate #1
			0.7	0.78	0.72	0.69
			0.5	0.48	1.73	0.38
			0	0	0.4	0.38
			1.16	0.43	0.72	0
			0.5	0	0.28	0.41
			1.2	0.39	1.29	0.95
			0	0	0.79	0.7
			0	0.09	0.4	0.39
			0.13	0.57	0.52	0.24
			0.64	0	0.7	0.48
			0.67	0.59	0.4	0.07
			1.6	0	0.12	0.43
			0.5	0.45	0.7	0.52
			0.4	0.61	0.55	0.55
			0.38	0.18	0.49	0.62
			0.38	0.57	0	0.5
			0.26	0.46	0.47	0.47
			0.83	0.2	0.7	0.27
			0.06	0.33	0.51	0.31
			0.8	0	0.01	0
			1.02	0.47	0.26	0.17
			0.76	0.35	0.54	0.41
			0.93	1.14	0.69	0.74
			0.06	0	0.71	0.43
			0	0.19	0.36	0
			0.64	0.42	0.28	0.74
			0.02	0	0	0.23
			0.49	0	0.43	0.46
			0.55	0.61	0.34	0.44
			0	0.23	0	1.55
			0.56	0.67	0.41	0.43
			0.67	0	0.69	0.58
			1.3	0.39	0.3	1.03
			0.56	0.58	0	0.83
			0.76	0	0.53	0.68
			0.71	0.16	0.58	0.67
			0.04	0.39	0.1	0.37
			1.04	0.49	0.24	0.46
			1.13	0.09	0.46	0.2
			1.07	0.33	0.51	0.59
			0.57	0.57	0.29	0.61
			0.96	0	0.38	0.55
			0.76	0.49	0.42	0.46
			1.33	0.11	0.34	0.51
			0.72	0	0	0.55
			0.75	0.22	0	0.58
			0.07	0	0.49	0.44
			0.68	0	0.38	0.24
			0.52	0.47	0.45	0.3
			0.29	0.48	0.45	0.74
			0.4	0.7	0.43	0.25
			0.73	0.06	Replicate #2	0.58
			0.45	0.53	0.52	0.29
			0.66	0	0	0.27
			0.59	0.29	0	0.39
			0.46	0.15	4.84	0
			0.11	0.42	0.65	0.28
			0.44	0.17	0.28	0.62
			0.56	0.51	0.67	0.55
			0	0	0.5	0.48
			0.58	0.47	0.66	0.67
			0.31	0.2	0.03	Replicate #2
			0	0	1.19	0.38
			0.56	0	0.6	0.46
			0.18	0	0.02	4
			0.55	0	0.53	0.84
			0.55	0	0.85	0
			0.63	0.26	0	0.68
			0.35	0.2	1.05	0.33
			0.89	0.11	0	0
			0.72	0.57	0.25	0.75
			0.74	0.87	0.96	1.36
			0.63	0	0	0.74
			0.58	0	2.71	0.78
			0.63	0	0.44	0.68
			0.6	Replicate #2	0.95	0.96
			Replicate #2	0.56	0	0.03
			0	0.04	1.82	0.77
			1.9	0.91	0	1.39
			1.03	0	0.81	1.22
			1.02	0.12	0.9	0.36
			0.03	0.21	0.37	0.81
			0	0	2.28	1.28
			0.06	0.05	0.39	0.07
			0.34	0.73	0	1.68
			0.57	0	0.89	0.67
			0.54	0	0.88	0.54
			0.33	0		0.9
			0.7	0.16		0.69
			0.64	0.88		0.85
			0.83	0		1.06
			1.4	0		0.87
			0.42	2.3		2.26
			0.62	0		1.16
			0.81	0		0.86
			1.35	0.19		0.99
			0.83	0.31		0.61
			0.41	4		0.72
			1.01	2		3.45
			0.85	0.94		0.91
			1.03	0		0.75
			1.18	0.76		0.83
			0.71	1.07		0.87
			0.83	1.4		0.79
			0.03	0		0.82
			1.09	0		0.46
			1.1	0
			0.48	0
			0.72	0
			1.03	0
			0.51	0.81
			0.87	0
			0	0
			0.56	4
			0.35	0.73
			1.76	0
			0.53	0
			0.21	1
			1.09	0.41
			0.99	0.19
			0	1.08
			0.85	3
			0.14	0.14
			0.44	1.51
			0	0
			0.57	0.26
			0.58	0.51
			1.34	0.24
			0.53	0
			0.35	0.43
			0.85	0.19
			0.58	0
				1
				0.3
				0.74
				0

## Sheet: Panel G
			% Early Midbodies with ALIX Present (11 h post-thymidine release)
			siControl		siNups DMSO
			DMSO	AurBi	DMSO	AurBi
		Replicate #1	79	82	19	61
		#2	80	85	28	67
		#3	86	87	36	87
		#4	71	82	34	66
		#5	75	90	26	56

## Sheet: supplement 1A
		%All Midbodies with CEP55 Present
			(includes early-stage midbodies in Panel B)
			siControl			siNups
	Hours post-thymidine		Replicate #1	#2	#3	Replicate #1	#2	#3
		10 hours	100	97	92	99	97	91
		11 hours	98	99	91	100	95	94
		12 hours	99	99	73	100	99	96
		13 hours	99	98	75	98	99	88
		14 hours	98	95	74	97	99	79

## Sheet: supplement 1B
			%All Midbodies with ALIX Present
				(includes early-stage midbodies in Panel D)
				siControl			siNups
		Hours post-thymidine		Replicate #1	#2	#3	Replicate #1	#2	#3
			11 hours	65	71	74	42	20	53
			12 hours	73	74	66	42	33	50
			13 hours	75	79	81	27	37	20
			14 hours	81	82	75	28	37	54
			15 hours	71	92	75	35	54	48
			16 hours	98	94	78	94	81	60

## Sheet: supplement 1C
				%Midbody-stage cells that are "early"
				siControl				siNups
		Hours post-thymidine		Replicate #1	#2	#3	#4	Replicate #1	#2	#3	#4
			10	49	49	62	46	50	48	49	43
			11	52	53	58	53	58	40	45	50
			12	34	33	54	36	44	42	54	45
			13	25	42	47	28	30	33	45	41
			14	22	36	36	28	33	31	38	27
			15	27	24	27	23	25	26	24	16
			16	20	34	20	13	18	20	25	6

## Sheet: supplement 1D
		ALIX:CEP55 Relative Intensity at the Midbody
		(includes early-stage midbodies in Panel F)
		11 h post-thymidine		16 h post-thymidine
		siControl	siNups	siControl	siNups
		Replicate #1	Replicate #1	Replicate #1	Replicate #1
		0.7	0.78	0.72	0.69
		0.5	0.48	1.73	0.38
		0	0	0.4	0.38
		1.16	0.43	0.72	0
		0.5	0	0.28	0.41
		1.2	0.39	1.29	0.95
		0	0	0.79	0.7
		0	0.09	0.4	0.39
		0.13	0.57	0.52	0.24
		0.64	0	0.7	0.48
		0.67	0.59	0.4	0.07
		1.6	0	0.12	0.43
		0.5	0.45	0.7	0.52
		0.4	0.61	0.55	0.55
		0.38	0.18	0.49	0.62
		0.38	0.57	0	0.5
		0.26	0.46	0.47	0.47
		0.83	0.2	0.7	0.27
		0.06	0.33	0.51	0.31
		0.8	0	0.01	0
		1.02	0.47	0.26	0.17
		0.76	0.35	0.54	0.41
		0.93	1.14	0.69	0.74
		0.06	0	0.71	0.43
		0	0.19	0.36	0
		0.64	0.42	0.28	0.74
		0.02	0	0	0.23
		0.49	0	0.43	0.46
		0.55	0.61	0.34	0.44
		0	0.23	0	1.55
		0.56	0.67	0.41	0.43
		0.67	0	0.69	0.58
		1.3	0.39	0.3	1.03
		0.56	0.58	0	0.83
		0.76	0	0.53	0.68
		0.71	0.16	0.58	0.67
		0.04	0.39	0.1	0.37
		1.04	0.49	0.24	0.46
		1.13	0.09	0.46	0.2
		1.07	0.33	0.51	0.59
		0.57	0.57	0.29	0.61
		0.96	0	0.38	0.55
		0.76	0.49	0.42	0.46
		1.33	0.11	0.34	0.51
		0.72	0	0	0.55
		0.75	0.22	0	0.58
		0.07	0	0.49	0.44
		0.68	0	0.38	0.24
		0.52	0.47	0.45	0.3
		0.29	0.48	0.45	0.74
		0.4	0.7	0.43	0.25
		0.73	0.06	1.06	0.58
		0.45	0.53	1.01	0.29
		0.66	0	1.12	0.27
		0.59	0.29	1.02	0.39
		0.46	0.15	0.83	0
		0.11	0.42	0.77	0.28
		0.44	0.17	0.9	0.62
		0.56	0.51	0.67	0.55
		0	0	0.53	0.48
		0.58	0.47	0.65	0.67
		0.31	0.2	0.45	0.56
		0	0	0.72	0.58
		0.56	0	0.45	0.5
		0.18	0	0.25	0
		0.55	0	0.8	0.42
		0.55	0	0.67	0.33
		0.63	0.26	0.78	0.28
		0.35	0.2	0.5	0.49
		0.89	0.11	0.82	0.56
		0.72	0.57	0.51	0.7
		0.74	0.87	0.69	0.56
		0.63	0	1.14	0.45
		0.58	0	0.44	0.62
		0.63	0	0.68	0.55
		0.6	0.79	0.38	0.59
		0.83	0.78	Replicate #2	0.56
		0.55	1.55	0.52	0.52
		1.45	1.07	0	0.65
		0.75	0	0	0
		0.75	0	4.84	0.33
		1.63	0.64	0.65	0.48
		0.97	0.24	0.28	0.49
		1.12	0	0.67	0.53
		0.66	1.51	0.5	0.64
		0.55	0.45	0.66	0.31
		0.59	0.29	0.03	0.49
		0.44	0.44	1.19	0.65
		0.84	0	0.6	0.41
		0.75	0.6	0.02	0.47
		0.59	0	0.53	0.55
		0.46	0	0.85	0.44
		0.49	0.58	0	0.52
		0.83	0.43	1.05	0.33
		0.72	1.7	0	0.47
		0.92	0.91	0.25	0.54
		0.91	0.15	0.96	0.47
		1.86	0.13	0	0.63
		0.35	0.9	2.71	0.28
		0.3	1.31	0.44	0.43
		0.59	0	0.95	0.37
		1	0.31	0	0
		1.2	0.09	1.82	0.64
		Replicate #2	0	0	0.39
		0	0.03	0.81	0.92
		1.9	0.75	0.9	Replicate #2
		1.03	0.56	0.37	0.38
		1.02	0	2.28	0.46
		0.03	0.66	0.39	4
		0	0.28	0	0.84
		0.06	0.01	0.89	0
		0.34	0.43	0.88	0.68
		0.57	0.6	0.85	0.33
		0.54	0.6	0.01	0
		0.33	0	0.83	0.75
		0.7	0	0.62	1.36
		0.64	0	1.08	0.74
		0.83	0.59	0.24	0.78
		1.4	0.53	0.52	0.68
		0.42	0.26	1.23	0.96
		0.62	0	1	0.03
		0.81	0.61	0.39	0.77
		1.35	0.43	0.98	1.39
		0.83	Replicate #2	1.15	1.22
		0.41	0.56	0.89	0.36
		1.01	0.04	0	0.81
		0.85	0.91	0.64	1.28
		1.03	0	0.69	0.07
		1.18	0.12	0.6	1.68
		0.71	0.21	0.34	0.67
		0.83	0	0	0.54
		0.03	0.05		0.9
		1.09	0.73		0.69
		1.1	0		0.85
		0.48	0		1.06
		0.72	0		0.87
		1.03	0.16		2.26
		0.51	0.88		1.16
		0.87	0		0.86
		0	0		0.99
		0.56	2.3		0.61
		0.35	0		0.72
		1.76	0		3.45
		0.53	0.19		0.91
		0.21	0.31		0.75
		1.09	4		0.83
		0.99	2		0.87
		0	0.94		0.79
		0.85	0		0.82
		0.14	0.76		0.46
		0.44	1.07		0.81
		0	1.4		0.65
		0.57	0		0.43
		0.58	0		0.8
		1.34	0		0.76
		0.53	0		1.42
		0.35	0		0.39
		0.85	0		1.09
		0.58	0.81		0.02
		1.1	0		0.95
		1.08	0		0.91
		1.57	4		0.67
		0.92	0.73		0.85
		0.81	0		0.77
		0.54	0		0.39
		0.93	1		0.69
		0.8	0.41		0.03
		0.59	0.19		0.9
		1.26	1.08		1.22
		0.89	3		0.81
		0.41	0.14		0
		0.4	1.51		0.47
		0.68	0		0.61
		0.98	0.26		0.82
		0.56	0.51		1
		0.38	0.24		0.63
		0.29	0		0.78
		0.56	0.43		0.41
		0.54	0.19		0.52
		0.39	0		1.04
		0.59	1		0.85
		0.37	0.3		1.3
		0	0.74		1.51
		0.28	0		1.28
		0.23	0.18		1.61
			0.21		1.23
			1.06		1.19
			0.15		0.71
			0.77		0.7
			0.9		1.44
			1.33		0.51
			0.75		0
			1.44		0.48
			0.14		0
			0.29		0.93
			0.04		1.56
			0.59		0.69
			0.12		1.23
			0.05		1.95
			0.71		1.13
			0		0.61
			0.49		0.71
			0.07		0.75
			0.25		0.73
			0.77		0.84
			0		0.48
			0.16		0.47
			0.43		1.14
			0.01		1.27
			0.21		1.18
			0		0.5
			0.18		0.59
			0.35		1.08
			0		0.47
			1.2		0.89
			0.1		0.98
			0		1.23
			1.44		0.53
			2.8		0.57
			0.56		0.41
			0
			0
			0.72
			0
			0.36
			0.68
			0
			0.2

## Sheet: supplement 2B
										% Midbodies with TSG101 Present
				All Midbodies (includes early-stage midbodies at right)									Early Midbodies
				siControl				siNups					siControl				siNups
	Hours Post-Thymidine			Replicate #1	#2	#3	#4	Replicate #1	#2	#3	#4		Replicate #1	#2	#3	#4	Replicate #1	#2	#3	#4
			11 hours	98	91	94	98	94	74	85	90		97	89	89	97	90	77	89	78
			12 hours	99	87	95	93	91	90	92	93		94	83	89	87	88	76	83	76
			13 hours	97	97	91	83	92	93	76	84		96	100	83	100	76	71	71	54
			14 hours	94	92	92	94	95	89	85	79		93	91	80	87	87	85	60	59
			15 hours	92	88	87	77	96	86	81	82		89	92	84	80	79	80	74	57
			16 hours	81	76	88	90	98	95	95	92		70	96	84	89	80	77	77	66

## Sheet: supplement 2D
			ALIX: TSG101 Relative Intensity at the Midbody
			early-stage midbodies
			11 h post-thymidine		16 h post-thymidine
			siControl	siNups	siControl	siNups
			Replicate #1	Replicate #1	Replicate #1	Replicate #1
			1.44	0.3	0	0.55
			4.15	0	4	0.97
			0	0.41	0.24	0.56
			0.61	0.18	0.95	0.27
			5	0.24	0.17	0.52
			2.2	1.46	4	0.34
			0.87	1.07	4	0.69
			0.41	0.22	0.79	0.44
			1.06	0	0.65	0.44
			0.85	0	0.95	0.74
			0.36	0.29	0.09	0.56
			0	0.37	0.32	0.71
			0	0.05	0.26	0.41
			0.55	0	0.44	0.4
			0.49	0	0.39	0.55
			1.09	0	1.17	0.15
			1.23	0.41	0.31	0.61
			1.35	0.12	0.34	0.59
			0.56	0.36	1.49	0.75
			0.78	0.97	1.12	0.75
			0.73	0.14	0.26	0.38
			0.7	0.14	0.78	0.32
			1.51	0	0.61	0.58
			2.04	0.24	0.27	0.47
			1.76	0.21	0.1	0.61
			0.42	1.22	0.99	0.36
			2.07	0.34	0.76	0
			0.83	0	1.22	0.31
			0	1.81	1.44	0.63
			0.17	0	1.07	0.73
			0.74	1	0.19	0.22
			0.02	1	0.78	0.39
			0.4	0	1.88	0.62
			1.54	0.05	0.37	0.3
			0.88	0.02	0.49	0.24
			0.29	0.34	0.34	0.11
			0.23	0.14	0.99	0.4
			1.25	0.14	0	0.41
			0.1	0.21	0.53	0.5
			0.78	0.4	0.62	1.02
			0.4	0.64	1.03	0.71
			1.15	0.32	0.33	0.48
			1.08	0	0.94	1.35
			0.85	0.79	0.96	0.9
			0.62	0.16	0.36	1.2
			0.8	0.19	1.02	1.33
			1.23	0.27	0	0.59
			0.68	0.42	0.35	0.66
			1	0.03	0.29	0.75
			0.3	0	0.83	0.41
			0.71	1.43	0.32	1.16
			0.47	0.33	0.4	0.8
			1.02	0.26	1.19	0.52
			1.07	0.05	0.53	0.43
			0.18	0.21	0.25	0.64
			0.54	0.76	1.68	0.83
			0.18	0.31	1.26	0.41
			0.07	0.32	0.66	1.01
			0.14	0.29	0.47	0.32
			0.59	0.61	0.3	0.4
			1.63	0.35	0.89	0.46
			0.68	0.35	2.08	0.6
			0	0.56	0.94	0.52
			0.88	0.28	1.4	0.46
			0.05	0.05	0.63	1.62
			0	0	2.32	0.56
			0.01	0.19	1	0.31
			0.41	1	0.56	0.59
			0.24	0.16	1.1	0.2
			0.95	0	0.6	0.39
			0.24	0.21	1.18	0.61
			1.76	0.57	0.96	0.67
			1.11	0.11	0.29	0.04
			3.24	0.18	1.85	0.31
			1.52	0	0.63	0
			1.06	0	1.23	0.49
			0.94	0.15	1.02	0.56
			1.09	0.36	0.77	0.38
			2.05	0.92	0.77	0.15
			0.78	0.24	0.87	0.09
			1.42	0.54	0.64	0.65
			0.64	1.07	1.18	0.88
			3.26	0	0.57	0.43
			2.27	0.58	0.59	0.63
			1.17	0	0.83	0.26
			1.68	1.57	1.31	0.38
			2.05	0.45	0.16	0.4
			1.39	0	0.88	0.39
			0.89	1.48	0.87	0.67
			0.86	0.8	0.58	1.18
			0.97	1.26	0.99	0.8
			0.82	0	0.67	0.38
			0.8	0.4	0.38	0.15
			0.81	0.5	1.53	0.63
			1.19	1.66	2.07	0.54
			0.87	0.28	0.88	0.52
			0.68	0.16	0.28	0.96
			1.22	0	0.34	0.54
			1.08	0.35	Replicate #2	1.15
			1.03	0.18	0.34	0.58
			1.13	0	2.37	0.66
			1.26	0.3	3.21	0.31
			1.64	0.17	1.53	0.89
			1.16	1.07	2.39	0.88
			1.36	0	3.47	0.52
			0.59	2.12	0	0.24
			1.41	0.45	1.46	0.52
			0.98	0.13	2.15	0.87
			0.71	0.27	1.01	0.66
			1.1	1.47	2.55	0.68
			0.55	0.29	1.64	0.45
			1.41	0.24	2.81	0.74
			0.96	1.31	2.87	0.94
			1.62	0.51	0.86	1.11
			0.99	0.71	1.88	0.45
			2.04	1.09	0.93	0.43
			0.85	0	2.34	0.59
			1.28	0	1.96	0.43
			0.19	0	1.77	0.64
			Replicate #2	1.34	0.65	0.4
			1.17	0.39	0.63	0.74
			0.65	0.14	0.94	0.08
			0.24	0.35	0.06	0.86
			0.19	0.73	0.03	0.63
			0.67	0.57	3.07	0.73
			2.2	0.9	0.18	0.58
			0.67	0.98	2.38	0.03
			1.92	1.17	0.92	0.4
			1.46	1.85	3.76	0.74
			1.27	0.35	2.63	1.2
			1.12	0.34	0.31	0.78
			0.63	0	1.25	0.42
			0.76	0.4	2.07	0.27
			0	0.05	0.93	0.92
			3.8	0.02	1.03	0.71
			1.82	1.23	1.15	0
			2.66	0	0.91	0.49
			1.17	0.31	2.86	0.7
			1.86	0	1.66	0.57
			0.43	0.39	5.21	0.81
			0.35	0	0.49	0.58
			2.59	Replicate #2	0.67	0.53
			2.08	1.21	2.39	0.73
			1.96	0	0.28	0.2
			1.14	0	2.98	0.34
			2.33	0	1.8	1.08
			2	0.29	0.96	0.28
			1.18	0.13	0.77	0.51
			1.51	1.27	0.64	0.53
			0.81	0	2.03	0.45
			0.31	0.16	2.15	0.59
			0	0.22	3.39	0.59
			0.61	0.48	0.7	Replicate #2
			2.37	0.49	1	1.24
			2.03	0.17	0.45	0.45
			0.21	0.78	0.46	0.24
			2.13	0.42	0.51	0.93
			1.5	5	1.27	1.27
			0.75	0	1.06	1.45
			2.62	0.18	0.23	0.26
			1.79	0.68	1.03	1.8
			0.42	2.46	0.1	0.91
			4.35	0.73	1.2	0.21
			0.77	1.67	1.38	0.7
			0.69	0.05		1.02
			1.24	0.93		1.52
			1.97	0.12		1.51
			0.41	0.54		0.8
			1.95	0.71		2.12
			0.31	1.12		0.55
			0.97	0		0.23
			1.42	0.29		0.38
			1.42	0.28		0.58
			0.83	0		1.25
			2.56	2.15		1.54
			1.64	0.14		1
			1.22	0.74		0.62
			1.14	0.51		0.98
			0.83	0		0.4
			2.42	0.05		0.36
			3.25	0.86		0.84
			1.62	0.16		0.73
			0.85	0.1		0.36
			3.02	0.05		1.21
			1.91	0.44		1.19
			1.04	0.08		0.6
			0.99	0.4		1.65
			2.33	0.25		0.88
			3	0.03		0.11
			1.11	0		0.83
			1.94	1.14		0.48
			1.88	0.05		1.42
			3.95	0		1.04
			3.45	0.8		0.84
			2.78	0.08		1.34
			1.59	0.48		0.91
			1.62	0.04		1.19
			2.07	0		0.67
			1.9	0.45		0.37
			2.97	0.53		1.28
			0.94	1.02		0.94
			2.04	0		0.79
			1.32	1.2		0.74
			0.49	3.31		0.37
			0.69	0.54		1.64
				3.01		1.06
				0.73		0.82
				1.91		0.82
				2.48		0.59
				0.34		1.69
				0.29		0.35
				1		1.27
				0		1.33
				0.23		0.97
				0.15		0.82
				2.1		1.39
				0.98		0.84
				0.47		1.84
				0.49		0.19
				0.96		1.09
				0.54		0.54
				0.35		1.54
				0.87		1.17
				1.76		1.31
				0.56		1.03
				0.02		0.63
				0.48		1.17
				0.73		1.61
				1.56		1
				0.38		0.47
				3.72		6.31
				2.67		1.1
				0.25		1.19
				0.21		0.43
				0.66		0.82
				1.53		1.28
						0.74
						0.9
						1.14
						0.87
						0.79
						0.53
						0.3
						1.6
						0.48
						0.27
						0.37
						1
						1.16
						1.55
						0.39
						1

[truncated: 2 more sheets: supplement 3B, supplement 3C]
