# Supplementary material for: Identification of abscission checkpoint bodies as structures that regulate ESCRT factors to control abscission timing
Source: eLife. 2021 Aug 4;10:e63743. doi: 10.7554/eLife.63743 (PMC8437436; doi:10.7554/eLife.63743)
Supplement: Figure 3—source data 1. [file elife-63743-fig3-data1.xlsx]

## Sheet: Panel B
					%Midbodies with pppCHMP4C Present
					siControl			siNups
		Hours post-thymidine			Replicate #1	#2	#3	Replicate #1	#2	#3
				11 hours	82	88	89	75	93	86
				12 hours	86	92	90	89	88	93
				13 hours	51	78	92	79	86	88
				14 hours	88	87	93	79	88	91
				15 hours	86	95	99	88	95	96
				16 hours	83	98	100	89	99	98

## Sheet: Panel C
					%Midbody-stage cells with ACBs marked by pppCHMP4C
					siControl			siNups
			Hours post-thymidine		Replicate #1	#2	#3	Replicate #1	#2	#3
				11 hours	18.54	22.71	30.5	55.17	58.57	61.32
				12 hours	4.35	9.05	8.42	66.17	52.26	59.06
				13 hours	12.96	12.9	10.5	55.09	62	63.87
				14 hours	5.97	6	11.62	77.17	75.49	74.12
				15 hours	4.5	5.66	7.37	75	79.9	84.16
				16 hours	6.01	6.1	4	78.64	77.09	79.92

## Sheet: Panel E
				%Midbody-stage Cells with ACBs Present
				siControl			siNups
			Marker	Replicate #1	#2	#3	Replicate #1	#2	#3
			pppCHMP4C	5.61	3.36	3.36	29.33	68	75.76
			pAurB	0	0	0.65	55	59	41
			CHMP4B	0	0	0.67	59	37	58

## Sheet: supplement 1A
				% Midbody-stage Cells in HA-CHMP4C Cell Line
				siControl			siNups
		Hours post-thymidine		Replicate #1	#2	#3	Replicate #1	#2	#3
			10 hours	8	12	24	16	10	18
			11 hours	34	14	29	36	18	36
			12 hours	32	29	45	59	39	46
			13 hours	34	31	28	60	52	57
			14 hours	21	25	25	65	53	67
			15 hours	19	15	12	49	56	57

## Sheet: supplement 1C
			%All Midbodies with HA-CHMP4C Present in HA-CHMP4C Cell Line									%Early Midbodies with HA-CHMP4C present in HA-CHMP4C Cell Line
			(includes early-stage midbodies at right)
			siControl			siNups						siControl			siNups
	Hours post-thymidine		Replicate #1	#2	#3	Replicate #1	#2	#3		Hours post-thymidine		Replicate #1	#2	#3	Replicate #1	#2	#3
		10 hours	33	38	27	33	39	27			10 hours	25	30	24	20	32	18
		11 hours	37	52	28	15	59	56			11 hours	28	47	44	35	52	18
		12 hours	39	51	51	36	63	38			12 hours	42	44	44	37	53	28
		13 hours	61	52	60	37	51	46			13 hours	58	48	53	20	50	41
		14 hours	54	62	61	41	79	47			14 hours	53	62	57	46	68	56
		15 hours	67	86	82	54	93	62			15 hours	58	84	82	58	92	66

## Sheet: supplement 1D
		% HA-CHMP4C Cell Line All Midbodies with ALIX Present									% HA-CHMP4C Cell Line Early Midbodies with ALIX Present
		(includes early-stage midbodies at right)
				siControl		siNups							siControl		siNups
		Hours post-thymidine		Replicate #1	#2	Replicate #1	#2				Hours post-thymidine		Replicate #1	#2	Replicate #1	#2
			10 hours	44	44	21	42					10 hours	42	47	14	14
			11 hours	52	61	31	48					11 hours	46	58	22	30
			12 hours	68	59	42	51					12 hours	58	41	22	33
			13 hours	84	82	70	62					13 hours	75	72	53	40
			14 hours	73	76	87	80					14 hours	59	51	76	40
			15 hours	94	92	99	99					15 hours	91	93	91	90

## Sheet: supplement 1F
				% Midbodies with pCHMP4C Present
				siControl			siNups
		Hours post-thymidine		Replicate #1	#2	#3	Replicate #1	#2	#3
			11 hours	95	95	97	87	92	99
			12 hours	97	98	100	92	99	92
			13 hours	69	88	85	52	86	80
			14 hours	88	89	96	86	94	90
			15 hours	99	90	100	94	96	90
			16 hours	98	99	99	98	92	99

## Sheet: supplement 1G
								%Midbodies with pCHMP4C in Each Morphology
				Strong Double Ring			Weak Double Ring			Strong Flemming Ring			Weak Flemming Ring			Disordered			Absent
				Replicate #1	#2	#3	#1	#2	#3	#1	#2	#3	#1	#2	#3	#1	#2	#3	#1	#2	#3
	11 h post-thymidine		siControl	34	9	11	14	3	1	30	58	54	5	21	19	12	3	12	5	5	3
			siNups	9	13	12	11	5	2	40	35	64	18	21	16	9	18	4	13	8	1
	16 h post-thymidine		siControl	9	6	6	4	0	0	64	75	66	7	5	9	14	13	19	2	1	1
			siNups	2	5	3	0	1	2	84	63	77	9	17	6	3	6	10	2	8	1
								%Midbodies with pppCHMP4C in Each Morphology
				Strong Double Ring			Weak Double Ring			Strong Flemming Ring			Weak Flemming Ring			Disordered			Absent
				Replicate #1	#2	#3	#1	#2	#3	#1	#2	#3	#1	#2	#3	#1	#2	#3	#1	#2	#3
	11 h post-thymidine		siControl	23	26	20	21	17	12	24	28	47	4	7	6	9	11	4	18	12	11
			siNups	22	21	26	16	20	20	22	31	32	0	4	1	16	16	7	25	7	14
	16 h post-thymidine		siControl	18	16	18	11	6	4	34	67	59	6	2	6	14	8	13	17	2	0
			siNups	52	50	38	9	12	7	20	32	35	0	2	2	8	3	16	11	1	2

## Sheet: supplement 2B
			Number of ACBs Marked by pppCHMP4C per Midbody-stage Cell
			siNups
Hours post-thymdine			11 hours	12 hours	13 hours	14 hours	15 hours	16 hours
			Replicate #1	Replicate #1	Replicate #1	Replicate #1	Replicate #1	Replicate #1
			12	13	23	65	10	16
			38	2	22	66	42	27
			38	3	38	31	41	28
			16	7	10	44	80	16
			38	5	24	26	49	45
			28	35	7	83	25	27
			16	19	29	Replicate #2	60	29
			25	32	57	29	23	16
			Replicate #2	20	16	24	19	52
			28	50	25	43	11	38
			47	45	42	59	55	36
			31	46	18	29	15	53
			22	28	36	10	7	28
			38	46	23	25	16	Replicate #2
			24	36	Replicate #2	18	15	15
			3		18	25	16	30
			9	Replicate #2	10	47	6	25
			Replicate #3	24	34	14	76	9
			16	62	18	29	47	23
			24	23	13	27	50	27
			23	44	3	46	21	10
			32	17	32	12	30	39
			21	8	6	63	11	22
			44	12	13	26	10	17
			32	10	19	32	19	28
			43	35	16	38	16	21
			32		29	28	Replicate #2	26
					18	8	52	15
					5	16	54	11
					26	38	44	32
					20	33	17	44
					18	17	33	7
					29	11	43	51
					27	Replicate #3	30	27
					Replicate #3	31	41	7
					28	27	28	36
					15	8	26	33
					13	2	16	7
					31	8	9	36
					16	5	31	4
					4	21	28	10
					18	18	9	18
					30	24	13	11
					16	22	36	28
					30	16	31	28
					8	20	10	30
					24	10	21	24
					39	9	28	23
						28	41	4
						14	11	Replicate #3
						20	38	19
						24	50	61
						27	19	17
						2	23	31
						22	20	47
						29	33	32
						23	39	20
						21	45	33
						14	64	13
						13	23	7
						16	17	15
						6	29	7
						3	59	22
						16	Replicate #3	7
						16	23	32
							21	21
							30	45
							24	19
							14
							32
							13
							19
							20
							14
							36
							18
							58
							9
							19
							14
							4
							10
							36
							28
							12
							37
