# Supplementary material for: Identification of abscission checkpoint bodies as structures that regulate ESCRT factors to control abscission timing
Source: eLife. 2021 Aug 4;10:e63743. doi: 10.7554/eLife.63743 (PMC8437436; doi:10.7554/eLife.63743)
Supplement: Figure 4—source data 1. [file elife-63743-fig4-data1.xlsx]

## Sheet: Panel F
			% Midbody-stage Cells with Foci Marked by pSC35
				60 minutes post-inhibitor
				DMSO	DYRK	CLK1
			Replicate #1	17.8	24	26.4
			#2	10	27.4	17
			#3	10.9	17.6	19
			#4	13.13

## Sheet: Panel G
			Minutes from Telophase to Abscission
			DMSO	DYRK3i	CLK1i
			Replicate #1	Replicate #1	Replicate #1
			50	55	70
			60	80	60
			70	70	90
			55	55	85
			50	60	60
			55	45	70
			45	90	75
			45	60	70
			75	55	80
			65	60	70
			50	70	110
			80	66	60
			70	90	90
			65	75	65
			65	70	65
			45	75	85
			55	90	80
			70	50	50
			65	125	90
			50	60	120
			60	65	95
			65	75	55
			45	50	60
			60	85	90
			85	105	80
			100	75	55
			65	85	55
			50	90	55
			65	110	80
			45	55	75
			45	65	75
			65	55	75
			45	80	65
			60	75	120
			45	100	65
			60	65	65
			50	65	70
			55	130	55
			50	60	70
			70	70	80
			65	70	60
			70	85	60
			60	85	65
			60	80	Replicate #2
			45	45	65
			50	75	70
			55	60	65
			50	65	65
			70	Replicate #2	70
			55	65	60
			40	90	70
			75	105	75
			65	70	75
			55	80	80
			95	65	80
			50	65	65
			50	60	65
			65	85	85
			45	65	60
			115	70	60
			65	70	60
			135	75	80
			55	85	70
			60	90	75
			80	70	65
			40	95	70
			50	90	80
			55	70	85
			50	60	85
			60	85	75
			45	90	85
			60	105	75
			120	75	60
			65	85	70
			65	60	75
			60	70	75
			50	80	90
			65	65	95
			65	120	75
			45	65	75
			65	55	75
			60	60	50
			55	70	65
			65	65	80
			50	75	75
			70	80	50
			65	65	65
			65	70	70
			60	80	55
			70	65	90
			55	90	65
			65	70	75
			55	80	90
			55	60	80
			70	55	70
			55	80	60
			65	70	60
			55	90	75
			55	70	90
			60	85	95
			60	85	110
			115	65	60
			70	85	75
			55	90	75
			55	95	105
			65	90	75
			65	115	65
			55	50	65
			65	70	60
			Replicate #2	90	70
			65	60	55
			60	65	75
			65	65	80
			65	65	75
			60	95	110
			60	100	95
			50	65	65
			65	80	75
			65	70	130
			120	70	90
			70	85	60
			95	65	65
			65	110	70
			80	90	60
			75	65	60
			65	70	65
			60	60	70
			75	85	65
			55	70	60
			50	50	60
			95	100	65
			50	95	45
			70	65	60
			50	70	65
			70	55	60
			70	55	60
			60	75	95
			50	80	60
			80	120	65
			70	95	55
			90	70	70
			85	95	75
			70	65	55
			55	55	60
			70	80	55
			85	75	60
			95	75	70
			65	70	60
			60	60	75
			75	110	65
			65	65	75
			60	65	65
			60	80	70
			60	65	80
			60	70	60
			50	65	55
			65	90	55
			80	55	85
			65	80	60
			115	80	76
			80	90	60
			55	95	60
			85	85	65
			55	50	60
			85	70	55
			60	105	70
			45	90	65
			40	85	100
			60	80	60
			55	90	55
			75	60	65
			70	65	65
			55	80	65
			50	130	65
			50	70	55
			55	75	50
			130	75	60
			50	90	105
			100	70	60
			80	70	55
			95	70	70
			80	60	60
			65	70	65
			55	90	70
			60	60	55
			50	65	65
			45	100	65
			85	Replicate #3	55
			60	60	55
			60	55	55
			65	70	60
			75	95	60
			45	65	50
			85	60	65
			60	60	65
			70	65	65
			90	60	60
			75	75	65
			65	70	70
			70	80	70
			90	60	75
			55	55	65
			55	70	85
			70	85	50
			80	75	55
			50	65	60
			70	55	75
			50	60	70
			75	65	80
			60	65	75
			105	90	60
			75	55	45
			85	85	75
			60	65	60
			65	75	65
			60	80	65
			60	85	55
			50	50	60
			60	85	Replicate #3
			55	90	75
			70	65	65
			55	80	85
			70	65	75
			85	55	70
			120	55	75
			55	65	75
			60	60	70
			75	70	55
			50	65	85
			75	60	65
			70	50	65
			95	125	55
			55	90	55
			65	90	55
			80	70	50
			55	55	60
			65	70	65
			70	60	60
			60	60	75
			55	45	70
			85	65	135
			55	90	55
			55	70	60
			70	70	70
			70	70	60
			50	65	70
			70	65	60
			70	55	75
			80	50	60
			60	55	60
			70	75	70
			60	60	65
			55	55	65
			80	60	70
			80	65	65
			90	70	60
			65	60	55
			90	95	60
			80	60	75
			65	65	140
			105	65	85
			55	55	80
			45	90	65
			50	100	70
			80	60	85
			110	85	60
			95	60	80
			70	65	70
			60	70	75
			85	60	75
			70	80	60
			65	80	55
			55	55	65
			55	95	60
			75	80	95
			65	70	75
			55	130	105
			55	60	70
			85	150	85
			50	55	75
			Replicate #3	60	60
			90	60	85
			75	65	65
			85	65	60
			50	65	60
			45	70	85
			45	65	70
			50	70	55
			55	80	55
			55	55	65
			50	60	65
			55	75	55
			65	60	70
			80	60	65
			50	55	100
			60	60	60
			55	55	65
			90	115	60
			75	70	80
			40	60	80
			75	65	60
			50	125	50
			115	75	75
			65	70	60
			55	55
			55	65
			50	65
			85	115
			70	65
			70	125
			95	85
			55	80
			65	65
			60	60
			95	55
			65	85
			50	65
			60	60
			60	55
			90	55
			45	70
			65	60
			50	70
			85	70
			55	65
			50	70
			55	95
			50	95
			75	70
			55	70
			50	60
			60	60
			60	60
			60	85
			60	60
			50	65
			50	75
			60	60
			55
			45
			65
			70
			60
			85
			75
			85
			95
			65
			80
			75
			70
			55
			65
			60
			65
			90
			55
			45
			55
			50
			60
			60
			60
			55
			55
			100
			45
			50
			65
			55
			50
			50
			60
			60
			45
			70
			55
			55
			45
			65
			50
			50
			65
			45
			50
			50
			65
			60
			65
			55
			55
			70
			65
			65
			70
			45
			60
			65
			70
			55
			50
			65
			70
			55
			55
			45
			115
			50
			60
			55
			50

## Sheet: Panel H
				%Midbody-stage cells
				Empty Vector	Empty Vector	CLK1 WT
				siCon	siNups	siNups
			Replicate #1	4.8	18.8	13.3
			#2	4.7	25.6	19
			#3	4.5	19.6	13
			#4	4.3	17.5	14
			#5	5.1	17.7	12.8
			#6	3.9	18.8	12.2

## Sheet: Panel I
			Mean number of ACBs per midbody-stage cell (with ACBs present)
					siNups
				Contruct:	Empty Vector	CLK1 WT
				Replicate #1	18.18	13.5
				#2	15.7	12.28
				#3	15.8	14.46
				#4	17.46	13.87
				#5	18.98	17.4
				#6	15.65	13.51

## Sheet: supplement 3B
				% Midbody-stage Cells after Drug Addition at Hour 13
				DMSO				DYRK3i 1 uM				CLK1i 1uM
	Hours post-thymidine			Replicate #1	#2	#3	#4	Replicate #1	#2	#3	#4	Replicate #1	#2	#3	#4
			13 hours	40.58	34.64	48.76	35.97	49.69	24.83	42.92	37.59	50.36	22.63	51.31	36.65
			14 hours	38.74	32.16	39.49	29.6	49.54	37.67	49.25	33.96	50.73	37.41	46.9	33.78
			15 hours	30.73	22.83	25.17	26.81	44.74	31.98	36.02	27.77	45.05	36.33	38.04	27.33
			16 hours	22.33	20.28	18.12	18.11	33.14	23.67	29.02	21.99	34.29	32.43	21.91	23.17
			17 hours	13.67	15.87	9.49	10.17	20.83	23.45	14.35	17.47	27.58	20.37	9.29	15.64
			18 hours	13.73	10.47	8.84	6.68	12.35	16.43	9.47	9.52	13.49	16.33	8.2	9.5

## Sheet: supplement 3C
				% All Midbody-stage Cells with Foci Marked by pSC35								% Early Midbody-stage Cells with Foci Marked by pSC35
				(includes early-stage midbodies at right)
				15 h post-thymidine			16 h post-thymidine					15 h post-thymidine			16 h post-thymidine
				DMSO	DYRKi	CLK1i	DMSO	DYRKi	CLK1i			DMSO	DYRKi	CLK1i	DMSO	DYRKi	CLK1i
			Replicate #1	5	8.55	7.19	7.92	8.87	9.8		Replicate #1	27	46.67	42.42	33.02	40	39.81
			#2	12.31	13.08	14.96	13.46	12.9	14.68		#2	27	39	35	28.71	33.33	41.07
			#3	4.91	3.97	5.41	2.72	3.66	5.59		#3	20	28	26	18	30.69	40
			#4	4.11	7.09	5.59	4.23	3.45	10.45		#4	21	40	33.66	20	34	37.62

## Sheet: supplement 3D
		% All Midbody-stage Cells with Foci Marked by pAurB								% Early Midbody-stage Cells with Foci Marked by pAurB
		(includes early-stage midbodies at right)
		15 h post-thymidine			16 h post-thymidine					15 h post-thymidine			16 h post-thymidine
		DMSO	DYRKi	CLK1i	DMSO	DYRKi	CLK1i			DMSO	DYRKi	CLK1i	DMSO	DYRKi	CLK1i
	Replicate #1	10	6.56	6.36	11.43	3.7	9.01		Replicate #1	32.04	46	32.69	34	31.07	43
	#2	5.71	15.5	9.46	7.58	7.97	12.14		#2	18.18	38.24	34	20.69	26.47	40.57
	#3	2.03	5.63	2.2	5.48	4.08	5.56		#3	14	23.76	27	11.65	25	42.02
	#4	4.17	8.85	7.46	11.43	7.86	10.69		#4	11.88	34.21	34.65	14	23.36	37.61

## Sheet: supplement 4A
		Western blots shown in Supplement 4A

## Sheet: supplement 4B
		Mean ratio of nuclear to cytoplasmic SRRM2 intensity in midbody-stage cells with ACBs present
					siNups
				Construct:	Empty Vector	CLK1 WT
				Replicate #1	0.95	1.033
				#2	0.945	1.199
				#3	0.948	1.095
				#4	0.962	1.12
				#5	1.055	1.467
				#6	1.051	1.302
