# Supplementary material for: Identification of abscission checkpoint bodies as structures that regulate ESCRT factors to control abscission timing
Source: eLife. 2021 Aug 4;10:e63743. doi: 10.7554/eLife.63743 (PMC8437436; doi:10.7554/eLife.63743)
Supplement: Figure 5—source data 1. [file elife-63743-fig5-data1.xlsx]

## Sheet: Panel C
			%Midbody-stage RPE1 Cells with ACBs
			pSC35		pAurB
			siControl	siNups	siControl	siNups
		Replicate #1	4	78	2	92
		#2	6	89	10	77
		#3	0	91	0	83

## Sheet: Panel D
			%Midbody-stage Cells With or Without ACBs Marked by pAurB (expresssed as % total cells)									%Midbody-stage Cells With or Without ACBs Marked by pSC35 (expresssed as % total cells)
				pAurB									pSC35
				ACB Absent			ACB Present						ACB Absent			ACB Present
			siControl siControl	4.56	8.9	1.93	0	0	0.22			siControl siControl	6.1	4.85	2.63	0.06	0	0
			siNups siControl	5.18	11.13	5.78	16.93	16.82	22.58			siNups siControl	2.07	5.91	5.28	14.1	14.59	19.87
			siControl si4C	2.04	4.96	4.84	0.02	0.1	0			siControl si4C	1.15	3.71	8.01	0.08	0.08	0
			siNups si4C	3.27	5.66	2.62	2.37	2.55	2.03			siNups si4C	2.37	3.36	3.13	1.79	2.11	3.72

## Sheet: supplement 1B
				%Midbody-stage Cells
				DMSO			Aphidicolin
	Hours post-thymidine			Replicate #1	#2	#3	Replicate #1	#2	#3
			12 hours	31.49	27.16	25.19	11.4	13.25	10.83
			14 hours	29.47	29.68	22.7	32.45	34.52	27.78
			16 hours	23.07	17.41	15.77	32.98	29.45	26.61
			18 hours	11.63	11.32	12.7	17.36	18.51	17.62

## Sheet: supplement 1C
			Minutes from Telophase to Abscission
				DMSO	Aphidicolin
				Replicate #1	Replicate #1
				50	65
				60	100
				70	95
				55	55
				50	90
				55	85
				45	75
				45	85
				75	80
				65	75
				50	70
				80	70
				70	70
				65	85
				45	70
				50	90
				55	80
				70	80
				65	55
				50	85
				60	65
				55	95
				64	70
				45	65
				60	65
				85	60
				100	115
				65	65
				50	85
				65	95
				45	80
				45	85
				65	55
				45	Replicate #2
				50	110
				60	135
				45	75
				60	100
				50	160
				55	140
				50	65
				70	85
				65	115
				70	135
				60	100
				50	130
				60	65
				45	90
				50	120
				55	105
				50	120
				70	95
				55	90
				40	125
				75	100
				65	125
				55	100
				95	175
				50	Replicate #3
				50	95
				65	100
				45	80
				115	90
				65	85
				135	95
				55	90
				60	80
				70	120
				40	55
				50	80
				55	70
				50	90
				60	85
				45	75
				60	115
				120	75
				65	70
				65	75
				60	70
				55	70
				50	65
				65	55
				55	65
				65	80
				45	80
				65	60
				50	45
				60	55
				55	75
				65	95
				50	95
				55	65
				70	85
				65	125
				70	105
				65	95
				60	80
				70	65
				60	70
				65	65
				55	65
				65	70
				55	65
				55	75
				70	60
				60	75
				55	75
				80	70
				55	65
				60	75
				65	60
				75	75
				55	60
				50	100
				55	70
				60	70
				60	80
				115	75
				70	70
				55	70
				55	65
				50	105
				55	75
				55	100
				55	85
				55	105
				65	80
				65	90
				60	75
				55	100
				65	110
				Replicate #2	75
				32	75
				60	70
				65	75
				65	85
				60	80
				60	85
				50	65
				65	65
				80	80
				65	70
				120	60
				70	85
				95	65
				65	90
				45	65
				80	80
				75	90
				65	90
				60	85
				55	75
				75	55
				55	80
				50	65
				80	85
				95	105
				60	95
				50	75
				70	75
				50	100
				70	110
				70	75
				60	80
				50	85
				80	75
				60	80
				90	80
				85	95
				70	65
				55	65
				70	75
				85	70
				95	85
				65	50
				60	65
				75	60
				65	80
				60	60
				60	90
				60	90
				60	75
				50	75
				65	55
				60	80
				50	65
				55	100
				60	70
				80	85
				65	75
				65	75
				40	60
				115	80
				80	75
				55	85
				85	75
				60	135
				55	125
				85	110
				60	75
				45	70
				40	90
				60	65
				55	75
				75	70
				70	80
				55	100
				55	65
				50
				50
				55
				45
				60
				130
				50
				100
				80
				70
				95
				80
				50
				65
				55
				60
				50
				45
				85
				55
				60
				60
				65
				75
				60
				50
				60
				45
				85
				60
				70
				90
				75
				65
				70
				50
				60
				60
				90
				55
				55
				70
				80
				50
				65
				90
				85
				75
				70
				50
				75
				60
				60
				105
				75
				85
				60
				65
				60
				60
				50
				60
				55
				70
				55
				60
				70
				50
				70
				85
				60
				80
				120
				55
				65
				60
				75
				50
				75
				70
				95
				50
				55
				65
				80
				45
				65
				55
				90
				50
				65
				70
				60
				55
				85
				70
				65
				55
				55
				65
				70
				70
				50
				70
				70
				80
				60
				55
				70
				60
				55
				65
				80
				80
				90
				65
				90
				85
				80
				80
				65
				60
				105
				55
				60
				65
				45
				50
				55
				50
				65
				80
				65
				60
				80
				110
				95
				70
				60
				85
				70
				65
				55
				75
				55
				75
				65
				55
				55
				55
				85
				45
				50
				50
				55
				Replicate #3
				90
				75
				85
				55
				50
				45
				45
				50
				55
				65
				55
				55
				50
				55
				65
				80
				45
				60
				55
				50
				60
				55
				55
				45
				90
				75
				40
				75
				50
				115
				45
				60
				65
				70
				50
				50
				55
				70
				55
				55
				55
				50
				85
				70
				70
				95
				55
				65
				60
				95
				65
				50
				55
				75
				50
				60
				60
				90
				45
				60
				65
				50
				85
				55
				50
				55
				50
				75
				55
				50
				60
				60
				50
				70
				60
				60
				50
				50
				70
				50
				60
				60
				60
				55
				65
				45
				65
				70
				60
				60
				85
				50
				55
				75
				85
				95
				65
				80
				75
				70
				50
				55
				65
				70
				65
				90
				70
				65
				60
				55
				45
				55
				50
				55
				60
				60
				50
				90
				60
				65
				70
				60
				55
				55
				100
				45
				50
				65
				55
				50
				50
				60
				60
				45
				70
				55
				60
				55
				45
				64
				50
				50
				65
				45
				55
				50
				50
				70
				65
				60
				65
				55
				55
				70
				65
				75
				55
				50
				50
				50
				65
				70
				45
				60
				65
				70
				55
				50
				55
				55
				75
				65
				70
				55
				55
				70
				55
				65
				45
				115
				50
				60
				55
				50

## Sheet: supplement 1E
						%Midbody-stage Cells with ACBs Marked by pAurB
						DMSO			Aphidicolin
			Hours post-thymidine			Replicate #1	#2	#3	Replicate #1	#2	#3
					12 hours	5	2.7	10.9	19.8	28.2	27.5
					14 hours	6.5	13.5	7.8	13.1	16.9	20
					16 hours	11.2	1.8	5	8.7	9.4	13.7
					18 hours	6.9	8.6	12.6	7.3	12.3	6.8

## Sheet: supplement 1G
			ALIX Intensity at the Midbody
	Hours post-thymidine		12 hours		14 hours		16 hours		18 hours
			DMSO	Aphidicolin	DMSO	Aphidicolin	DMSO	Aphidicolin	DMSO	Aphidicolin
			Replicate #1	Replicate #1	Replicate #1	Replicate #1	Replicate #1	Replicate #1	Replicate #1	Replicate #1
			72.08	104.2	76.67	65.49	67.67	159.78	73.2	39.78
			99.19	121.91	0.01	141.73	123.16	34.27	149.74	165.61
			110.45	114.08	45.93	110.76	152.14	16.13	148.93	71.49
			46.27	33.43	136.61	38.05	98.73	130.91	112.12	73.12
			79.22	66.58	101.27	7.05	112.83	96.2	56.63	134.11
			80.01	33.44	23.8	26.87	139.34	117.36	112.68	98.07
			5.19	65.97	116.46	70.08	128.72	38.26	37.36	87.62
			32.34	33.51	91.85	91.69	97.17	106.48	50.18	127.18
			18.08	12.63	91.36	72.48	138.08	88.35	143.29	154.43
			62.34	21.46	111.7	0	126.97	102.58	115.5	119.58
			66.93	74.67	124.58	29.63	141.51	23.7	19.43	83.93
			140.92	17.08	155.81	9.01	75.13	35.34	84.01	155.17
			101.23	24.62	17.23	48.07	87.85	81.01	127.39	35.78
			29.5	47.8	135.9	93.38	77.86	38.96	53.29	95.3
			122.16	58.01	139.07	79.89	156.38	167.52	128.23	55.66
			94.34	10.49	141.91	1.92	29.28	151.15	145.58	105.14
			26.31	26.48	51.99	33.34	130.1	142.66	109.75	166.21
			108.79	14.28	117.87	134.71	28.15	107.83	47.68	102.92
			74.12	115.09	124.22	0.35	144.33	114.46	124.36	82.27
			64.59	14.51	29.14	90.52	127	110.99	68.11	56.81
			78.33	24.89	147.52	52.63	60.48	4.1	14.66	139.34
			25.22	116.99	138.05	9.58	68.27	29.14	10.46	133.71
			66.91	17.77	66.29	27.92	26.79	78.99	61.73	160.56
			53.49	66.19	117.34	29.07	82.77	58.69	114.86	130.48
			125.8	83.07	23.5	119.41	62.49	26.99	135.89	138.57
			109.44	33.78	69.91	72.72	149.71	120.02	86.14	141
			120.73	124.11	113.34	136.31	29.02	119.98	106.55	137.43
			86.59	27.74	80.99	79.69	128.72	110.44	75.38	93.31
			22.27	91.73	121.28	35.42	150.63	143	38.29	136.94
			100.18	35.23	141.81	53.87	100.92	137.29	114.63	133.41
			109.45	82.63	131.7	101.49	83.71	48.5	119.93	81.22
			74.15	35.51	56.84	65.46	89.1	54.82	74.23	140.43
			46.64	45.68	158.37	48.16	148.81	130.43	124.5	160.73
			71.28	89.92	51.88	93.1	129.39	119.66	Replicate #2	151.97
			52.5	19.44	102.81	147.12	68.86	82.38	86.41	24.39
			7.85	54.74	58.37	38.96	106.3	119.22	41.04	137.03
			50.93	35.83	113.64	109.1	124.03	126.45	81.12	61.05
			99.31	80.68	114.01	109.7	130.81	95.83	16.97	90.64
			80.18	120.67	124.75	23.51	119.66	136.06	108.85	155.26
			50.39	44.97	164.41	11.95	74.85	117.22	72.42	53.08
			18.49	Replicate #2	105.63	78.17	132.51	148.57	93.43	154.32
			0	28.43	88.86	83.04	55.59	49.38	23.49	98.25
			105.95	10.71	66.8	77.1	58.09	116.03	113.85	141.35
			44.57	10.91	96.51	48.22	Replicate #2	102.45	69.83	128.84
			89.02	47.05	125	26.31	98.96	151.07	51.83	Replicate #2
			52.07	27.15	39.94	2.99	52.54	55.84	88.17	11.81
			13.93	36.78	59.32	35.63	6.28	127.94	68.39	79.12
			127.18	39.4	31.64	72.86	33.77	77.47	65.45	61.54
			122.46	16.9	76	66.63	90.26	130.16	82.06	79.7
			3.12	8.74	74.59	59.81	60.62	50.16	88.41	84.46
			126.56	42.13	78.95	0	74.08	104.25	59.05	24.93
			52.26	12.44	127.03	52.71	26.17	78.37	53.25	21.4
			97.65	14.5	104.89	42.28	46.14	106.94	46.53	59.61
			100.67	32.08	64.34	21.57	48.27	92.05	122.53	116.91
			55.7	12.87	64.84	7.57	66.28	136.39	30.62	50.58
			36.68	40.23	34.68	26.43	68.58	138.98	67.74	51.48
			Replicate #2	59.49	104.43	17.49	39	Replicate #2	55.39	28.36
			19.58	20.62	Replicate #2	Replicate #2	25.29	56.39	34.51	37.92
			65.04	41.13	38.65	0	78.91	35.25	35.48	62.58
			50.21	21.61	54.58	64.15	60.69	50.29	26.5	67
			3.14	91.58	52.45	48.38	45.09	36.39	49.53	73.52
			0.67	32.92	26.69	30.72	81.22	28.61	41.49	88.49
			46.57	20.75	43.36	24.38	82.71	32.33	76.84	18.25
			34.88	15.61	19.49	49.45	59.61	36.24	64.72	11.4
			29.96	17.05	47.53	20.8	26.06	14.88	63.96	59.48
			20.15	27.06	50.18	15.34	7.8	7.16	62.16	80.6
			38.13	66.2	42.34	49.36	74.53	20.66	64.74	33.57
			41.22	22.29	59.75	7.68	53.48	17.81	83.85	31.09
			78.95	37.19	57.27	0	75.08	39.23	46.76	19.52
			27.59	23.08	75.37	51.38	75.03	29.66	24.88	74.29
			39.17	34.37	40.73	20.77	98.49	14.3	39.74	16.22
			15.67	4.17	19.13	44.39	69.25	43.5	Replicate #3	43.41
			78.34	18.81	6.28	83.73	125.51	16.84	41.2	87.9
			32.24	1.47	31.57	16.4	142.38	12.24	12.79	47.22
			24.73	58.46	23.64	63.17	24.92	41.47	54.66	71.11
			34.07	7.82	54.77	6.46	71.89	42.43	46	86.99
			56.91	39.65	58.34	3.33	130.81	52.83	55.18	10.21
			44.66	25.81	30.71	0.17	61.93	36.12	35.53	28.38
			37.64	23.09	51.73	55.79	15.95	31.42	59.51	0
			21.71	35.72	18.65	28.19	63.03	33.35	47.74	59.15
			42.82	43.96	75.88	51.09	27.89	11.08	13.53	26.48
			58.26	12	59.51	34.05	27.73	6.21	14.67	36.1
			50.97	27.98	51.44	35.63	58.03	19.29	21.45	Replicate #3
			33.47	45.48	32.12	26.89	97.12	46.99	16.39	66.11
			21.91	Replicate #3	14.95	38.59	93.89	34.82	16.3	23.86
			6.62	8.39	46.65	8.53	53.78	37.04	48.21	121.76
			65.99	30.52	46.97	11.93	28.14	14.86	69.43	39.9
			39.17	17.68	37.83	2.32	94.72	29.97	76.19	24.94
			63.52	12.73	17.5	47.52	76.34	17.5	64.81	46.04
			56.29	2.77	51.7	18.97	80.03	14.88	29.78	17.01
			45	38.05	35.7	12.16	34.23	55.77	62.86	27.01
			19.2	24.05	40.38	29.49	Replicate #3	28	23.97	2.97
			0	22.05	7.44	58.61	98.96	53.61	77.06	62.08
			29.22	45.09	44.96	17.14	52.54	17.29	60.51	9.83
			29.3	7.2	48.4	1.85	6.28	35.79	47.99	59.23
			26.95	5.5	44.79	35.04	33.77	68.03	57.31	29.01
			39.17	16.63	50.63	10.7	90.26	44.12	63.48	32.42
			17.46	24.74	18.51	24.2	60.62	35.71	45.1	19.1
			4.64	72.25	25.78	38.88	74.08	39.56	14.24	41.66
			78.57	5.01	38.87	37.38	26.17	31.49	65.93	71.75
			33.66	50.79	51.59	22.98	46.14	Replicate #3	24.56	41.74
			16.15	33.64	24.21	71.25	48.27	37.46	47.76	28.32
			68.86	6.29	34.11	58.8	66.28	30.25	57.07	7.66
			65.45	50.93	62.65	51.74	68.58	51.18	20.34	71.93
			64.01	13.15	44.5	75.67	39	41.75		15.1
			38.64	4.73	31.75	55.71	25.29	27.19		22.28
			Replicate #3	53.02	32.06	10.93	78.91	23.49		42.71
			31.9	22.1	42.15	43.14	60.69	25.08		14.51
			32.63	18.81	10.42	69.47	45.09	39.02		48.57
			21.51	17.36	10.52	72.79	81.22	27.44		52.91
			7.53	2.79	37.96	2.67	82.71	52.97		26.31
			37.3	6.6	36.71	8.92	59.61	18.89		12.88
			33.84	31.66	31.23	60.83	26.06	33.07		21.16
			14.08	22.21	48.24	28.14	7.8	9.55		0
			11.52	33.79	54.12	Replicate #3	74.53	41.96		85.08
			11.89	25.05	48.08	22.75	53.48	44.99		73.44
			37.43	16.35	36.42	6.31	75.08	39.2		65.3
			12.41	31	23.52	0	75.03	36.08
			41.76	13.41	44.86	36.42	98.49	54.44
			35.67	0	71.57	21.95	69.25	7.25
			45.34	7.22	17.91	4.4	125.51	34.07
			8.53		32.33	8.57	142.38	35
			42.97		32.06	61.52	24.92	25.93
			15.55		13.55	54.92	71.89	20.44
			18.48		21.56	36.15	130.81	30.54
			38.49		55.6	47.52	61.93	15.69
			38.87		32	47.78	15.95	42.49
			22.82		16.62	47.67	63.03	53.41
			31.42		0.23	70.31	27.89	29.94
			16.35		Replicate #3	22.95	27.73	47.75
			42.25		47.17	19.36	58.03	11.43
			19.85		11.12	49.69	97.12	38.45
			20.26		37.12	34.18	93.89	5.54
			44.62		59.44	7.67	53.78	40.46
			35.4		67.24	79.2	28.14	50.63
			33.17		70.77	47.9	94.72	27.24
			32.91		52.75	27.44	76.34	42.35
			14.76		40.72	13.8	80.03	48.42
			43.57		15.75	69.2	34.23	58.47
			33.75		42.88	81.12	79.97	44.57
			42.97		18.95	53.95	86.86	45.02
			51.2		46.81	16.49	60.9	22.23
			51.85		39.93	48.15	22.75	27.43
			32.4		69.16	4.46	74.55	35.38
			30.85		93.12	27.55	35.48	30.38
			22.6		49.37	65.67	66.77	38.84
			35.81		15.38	0	40.29	36.08
			14.17		65.85	0	33.51	20.99
			37.29		57.02	7.82	38
			10.11		57.39	18.01	36.74
			33.82		54.18	8.41	21.65
			29.16		20.61	46.54	104.6
			45.72		62.21	23.61	44.23
			32.67		56.22	28.19	36.95
			32.69		17.25	0	66.37
					4.08	25.25	2.08
					43.89	37.83	67.15
					12.03	32.14	72.45
					58.46		26.61
					64.45		65.22
					14.52		26.28
					32.74		52.88
					37.25		39.24
					67.37		39.4
					70.6		56.86
					50.6		11.9
					54.71		40.36
					51.35		16.88
					50.23		22.96
					22.37		72.66
					24.91		67.18
					40.79		36.95
					83.61		90.79
					86.99		43.71
					62.07		33.02
					55.88		86.37
					37.86		82.99
					55.53		82.12
							11.3
							96.83
							43.88
							26.31
							53.81
							9.66
							76.61
							85.97

## Sheet: supplement 2A
					%Midbody-stage Cells
					Low Tension	High Tension
				Replicate #1	6.34	11.74
				#2	2.99	9.75
				#3	5.04	9.89
				#4	4.85	12.97

## Sheet: supplement 2B
				%Midbody-stage Cells with ACBs
					Low Tension	High Tension
				Replicate #1	13.7	24
				#2	13.2	17.1
				#3	14	18.8
				#4	17.8	21.7

## Sheet: supplement 2D
				ALIX Intensity at All Midbodies
				(includes early-stage midbodies)
				Low Tension	High Tension
				Replicate #1	Replicate #1
				43.67	7.62
				59.61	14.22
				48.18	26.48
				41.44	60.63
				54.94	57.68
				88.52	65.67
				13.01	84.07
				49.64	42.48
				26.3	19.26
				15.72	71.39
				13.84	99.2
				23.26	13.14
				22.78	38.16
				36.52	3.41
				30.01	14.93
				15.42	29.92
				24.25	40.99
				22.98	87.31
				36.72	28.45
				43.52	22.82
				29.37	93.6
				42.07	64.18
				56.9	108.8
				78.69	31.87
				36.11	22.22
				41.28	39.65
				76.41	49.97
				70.91	97.85
				46.62	15.43
				10.36	12.49
				20.22	27.99
				78.64	110.76
				0	90.5
				19.43	117.46
				2.52	88.26
				28.86	31.98
				28.53	78.47
				6.94	73.33
				36.62	32.07
				3.3	19.68
				7.78	46.39
				30.65	11.81
				37.04	Replicate #2
				36.53	16.3
				9.55	0.3
				27.01	45.39
				78.7	0.83
				50.55	8.49
				60.92	28.77
				29.79	76.82
				31.02	0
				15.65	3.88
				13.81	2
				64.72	29.17
				57.52	7.12
				29.03	12.73
				34.08	15.17
				33.78	0.82
				Replicate #2	9.42
				17.97	51.57
				45.73	7.03
				16.85	1.24
				9.09	6.49
				0	8.67
				33.9	5.83
				55.54	123.15
				6.98	83.88
				99.32	109.44
				54.02	50.38
				1.27	75
				5.27	50.74
				73.16	13.68
				35.24	3.98
				19.24	70.79
				18.56	72.57
				7.2	58.88
				43.89	44.29
				12.7	39.1
				86.79	62.31
				81.41	38.55
				14.86	59.84
				101.06	20.81
				29.67	53.59
				27.07	76.75
				23.65	45.59
				57.29	59.65
				28.49	12.91
				85.07	83.17
				128.45	34.39
				101.01	58
				161.63	58.5
				102.62	Replicate #3
				82.04	81.7
				72	15
				Replicate #3	6.33
				48.95	10.77
				22.78	35.74
				0.75	7.92
				2.35	10.83
				60.39	10.44
				80.27	17
				56.11	13.81
				7.88	38.33
				30.49	35.5
				50.98	2.67
				6.96	11.83
				13.95	12.33
				6.18	1.33
				10.88	1.33
				21.2	4.17
				15.01	25.67
				83.2	59.4
				2.56	53.98
				8.66	13.81
				45.45	50.99
				39.25	38.63
				38.04	42.36
				36.07	25.14
				61.13	81.69
				93.88	63.04
				71.28	30.83
				12.94	33.13
				83	82.67
				82.96	70.1
				74.31	40.88
				64.04	14.71
				102.44	Replicate #4
				42.63	9.22
				62.05	87.95
				35.92	73.3
				64.91	14.22
				56.35	29.09
				83.84	77.23
				99.46	21.06
				83.1	37.77
				Replicate #4	17.85
				3.77	30.95
				107.76	4.98
				43.28	34.12
				131.49	47.92
				54.92	23.85
				110.8	19.7
				37.62	60.17
				41.68	65.2
				30.32	52.16
				54.42	65.37
				10.97	75.34
				31.54	46.73
				110.77	90.36
				66.48	86.08
				65.36	99.63
				101.23	42.63
				36.62	98.24
				20.49	98.19
				19.88	115.98
				44.37	104.71
				94.95	121.75
				121.45	44.8
				151.7
				69.18
				81.44
				81.24
				104.6
				80.49
				99.67
				140.29
				88.38
				159.03
				52.29
				83.2
				126.85
				123.53
				97.41
				59.1
				133.97
				110.34
				168.43
				144.41
				123.08
				130.95

## Sheet: supplement 3B
		%Midbody-stage Cells with ACBs Marked by pAurB
		siControl	siNups	Control	Bridge
	Replicate #1	18.6	98	34	13.9
	#2	17.8	97.1	11.5	11.1
	#3	10	75.7	18.9	10

[truncated: 5 more sheets: supplement 3D, supplement 4A, supplement 4B, supplement 4C, supplement 5A]
