# Supplementary material for: Identification of abscission checkpoint bodies as structures that regulate ESCRT factors to control abscission timing
Source: eLife. 2021 Aug 4;10:e63743. doi: 10.7554/eLife.63743 (PMC8437436; doi:10.7554/eLife.63743)
Supplement: Figure 6—source data 1. [file elife-63743-fig6-data1.xlsx]

## Sheet: Panel C
		%Midbody-stage Cells With or Without ACBs Marked b pSC35 (expressed as % of total cells)								%Midbody-stage Cells With or Without ACBs Marked b pAurB (expressed as % of total cells)
			pSC35								pAurB
			ACB Absent			ACB Present					ACB Absent			ACB Present
			Replicate #1	#2	#3	Replicate #1	#2	#3			Replicate #1	#2	#3	Replicate #1	#2	#3
		siControl siControl	6.28	2.6	5.45	0.06	0.06	0		siControl siControl	6.5	3.43	5.74	0	0	0
		siControl siNups	1.99	3.1	0.93	21.4	17.84	14.74		siControl siNups	4.05	2.43	1.25	23.59	15.38	11.85
		siALIX siControl	8.02	7.83	7.73	0.16	0	0		siALIX siControl	6.29	5.62	7.62	0	0	0
		siALIX siNups	3.17	4.53	1.31	24.61	16.69	13.08		siALIX siNups	3.1	1.74	1.02	15.87	14.67	11.09

## Sheet: Panel D
				Area of Individual ACBs (µm^2)
				pSC35		pAurB
				siCon/siNups	siALIX/siNups	siCon/siNups	siALIX/siNups
				Replicate #1	Replicate #1	Replicate #1	Replicate #1
				0.03	0.098	0.73	0.225
				0.056	0.321	0.896	0.495
				0.16	0.363	0.316	0.083
				0.357	0.142	0.166	0.081
				0.066	0.098	1.535	0.136
				0.112	0.258	0.995	0.436
				0.088	0.03	0.178	0.153
				0.044	0.158	0.489	0.058
				0.052	0.274	0.347	0.272
				0.052	0.332	0.23	0.067
				0.154	0.056	0.545	0.072
				0.186	0.416	0.438	0.069
				0.046	0.27	0.927	0.35
				0.086	0.351	0.162	0.078
				0.154	0.356	0.403	0.053
				0.072	0.077	0.091	0.598
				0.13	0.077	0.497	0.525
				0.042	0.505	0.257	0.092
				0.383	0.257	0.138	0.153
				0.062	0.158	0.065	0.108
				0.046	0.158	0.083	0.084
				0.062	0.05	0.082	0.23
				0.312	0.068	0.125	0.263
				0.664	0.063	0.078	0.088
				0.551	0.388	0.205	0.271
				0.425	0.271	0.062	0.28
				0.369	0.23	0.189	0.141
				0.34	0.036	0.092	0.135
				0.304	0.361	0.112	0.11
				0.166	0.234	0.054	0.088
				0.19	0.162	0.12	0.15
				0.235	0.216	0.085	0.06
				0.126	0.045	0.051	0.157
				0.166	0.198	0.217	0.201
				0.097	0.153	0.06	0.066
				0.223	0.099	0.106	0.366
				0.093	0.149	0.095	0.124
				1.013	0.095	0.055	0.384
				0.207	0.262	0.089	0.079
				0.853	0.225	0.258	0.113
				0.422	0.068	0.289	0.197
				0.42	0.167	0.079	0.18
				0.233	0.144	0.398	0.105
				0.203	0.032	0.344	0.095
				0.264	0.045	0.112	0.056
				0.347	0.09	0.179	0.052
				0.393	0.045	0.415	0.44
				0.289	0.054	0.182	0.062
				0.219	0.041	0.231	0.203
				0.504	0.077	0.457	0.177
				0.399	0.059	0.256	0.141
				0.321	0.121	0.526	0.085
				0.556	0.212	0.089	0.082
				0.573	0.04	0.23	0.151
				0.283	0.048	0.061	0.105
				0.506	0.319	2.231	0.089
				0.094	0.125	0.759	0.157
				0.578	0.198	0.788	0.256
				0.048	0.062	1.292	0.135
				0.437	0.073	0.108	0.108
				0.044	0.139	0.162	0.108
				0.216	0.04	0.387	0.135
				0.304	0.249	2.138	0.089
				0.272	0.132	1.236	0.092
				0.453	0.033	0.317	0.056
				0.156	0.055	0.547	0.052
				0.295	0.179	0.562	0.066
				0.061	0.168	0.22	0.098
				0.193	0.132	0.816	0.184
				0.049	0.161	0.674	0.102
				0.088	0.048	0.376	0.157
				0.044	0.121	1.475	0.141
				0.037	0.267	0.369	0.2
				0.11	0.029	2.722	0.121
				0.081	0.114	0.201	0.197
				0.071	0.099	1.646	0.099
				0.142	0.081	0.096	0.061
				0.118	0.059	0.317	0.779
				0.144	0.095	0.15	0.726
				0.357	0.092	0.432	0.056
				0.034	0.176	0.358	0.078
				0.446	0.297	0.09	0.237
				1.606	0.143	0.219	0.317
				1.265	0.139	0.323	0.166
				0.037	0.15	0.202	0.786
				0.409	0.048	0.227	0.254
				0.849	0.033	0.829	0.771
				0.812	0.044	0.23	0.123
				0.149	0.15	0.367	0.144
				0.57	0.044	1.591	0.368
				0.26	0.557	0.391	0.949
				0.62	0.146	0.453	0.136
				0.087	0.037	0.246	0.667
				0.13	0.048	0.844	0.333
				0.062	0.154	0.143	0.599
				0.769	0.062	0.593	0.322
				0.496	0.038	0.28	0.113
				0.546	0.111	0.474	0.094
				0.422	0.232	0.208	0.31
				0.36	0.235	0.599	0.328
				0.198	0.13	0.708	0.684
				0.105	0.105	0.069	0.19
				0.167	0.108	0.198	0.444
				0.192	0.3	0.107	0.092
				0.18	0.202	0.36	0.199
				0.577	0.227	0.147	0.127
				0.682	0.17	0.135	0.057
				0.087	0.181	0.261	0.605
				0.44	0.305	0.177	0.378
				0.347	0.17	0.288	0.175
				0.298	0.059	0.374	0.516
				0.353	0.03	0.599	0.164
				0.683	0.275	0.366	0.442
				0.144	0.059	0.263	0.168
				0.258	0.049	0.08	0.227
				0.254	0.032	0.181	0.212
				0.072	0.185	0.133	0.068
				0.52	0.571	0.059	0.153
				0.368	0.169	0.403	0.428
				0.444	0.174	0.554	0.302
				0.425	0.323	0.082	0.509
				0.41	0.201	0.353	0.49
				0.926	0.286	0.181	0.077
				0.531	0.328	0.195	0.052
				0.308	0.238	0.194	0.824
				0.489	0.365	0.305	0.28
				0.371	0.153	0.194	0.192
				0.575	0.222	0.201	0.404
				0.143	0.127		0.33
				0.19	0.502	Replicate #2	0.372
				0.095	0.201	0.685	0.466
				0.111	0.407	0.443	0.568
				0.108	0.238	0.304	0.247
				0.149	0.164	0.209	0.437
				0.454	0.328	0.166	0.33
				0.283	0.058	0.225	0.383
				0.115	0.238	0.193	0.131
				0.334	0.418	0.347	0.289
				0.288	0.55	0.465	0.573
				0.373	0.27	0.261	0.531
				0.035	0.291	0.163	0.208
				0.049	0.123	0.123	0.251
				0.218	0.249	0.038	0.323
				0.062	0.479	0.069	0.226
				0.074	0.494	0.118	0.342
				0.692	0.123	0.036	0.076
				0.21	0.076	0.065	0.16
				0.21	0.108	0.341	0.768
				0.043	0.104	0.087	0.06
				0.369	0.177	0.051	0.359
				0.171	0.043	0.771	0.063
				0.097	0.094	0.225	0.422
				0.268	0.144	0.433	0.542
				0.031	0.104	0.274	0.312
				0.093	0.083	0.115	0.053
				0.229	0.061	0.886	0.086
				0.727	0.068	0.252	0.269
				0.173	0.043	0.364	0.216
				0.231	0.054	0.111	0.359
				0.138	0.068	0.177	0.16
				0.34	0.032	0.463	0.276
					0.072	0.054	0.266
				Replicate #2	0.09	0.132	0.246
				1.064	0.058	0.618	0.678
				0.105	0.04	0.677	0.356
				0.086	0.04	0.27	0.123
				0.055	0.061	0.428	0.196
				0.66	0.109	0.279	0.243
				0.203	0.087	0.249	0.595
				0.259	0.234	0.954	0.072
				0.144	0.042	0.625	0.202
				0.201	0.053	1.092	0.372
				0.242	0.105	0.125	0.091
				0.308	0.045	0.131	0.161
				0.148	0.042	0.122	0.146
				1.72	0.127	0.075	0.151
				0.055	0.067	0.106	0.159
				0.37	0.136	0.075	0.117
				0.467	0.1	0.086	0.072
				0.127	0.096	0.12	0.059
				0.047	0.04	0.19	0.064
				0.522	0.042	0.059	0.208
				0.2	0.321	0.452	0.083
				0.347	0.04	0.158	0.068
				0.137	0.102	0.062	0.057
				0.075	0.196	0.305	0.2
				0.17	0.167	0.235	0.059
				0.162	0.091	0.073	0.249
				0.26	0.359	0.499	0.056
				0.143	0.1	0.044
				0.086	0.446	0.14	Replicate #2
				0.197	0.18	0.176	0.147
				0.529	0.187	0.705	0.058
				0.248	0.045	0.114	0.147
				0.059	0.671	0.055	0.211
				0.173	0.25	0.206	0.458
				0.58	0.63	0.131	0.326
				0.049	0.818	0.231	0.195
				0.858	0.557	0.045	0.074
				1.018	0.047	0.272	0.137
				0.491	0.795	0.045	0.09
				0.113	0.127	0.078	0.068
				0.516	0.443	0.2	0.042
				0.424	0.428	0.043	0.163
				0.091	0.684	0.069	0.116
				0.069	0.53	0.198	0.263
				0.648	0.488	0.088	0.095
				0.04	0.187	0.088	0.353
				0.492	0.178	0.037	0.19
				0.146	0.265	0.491	0.137
				0.163	0.036	0.06	0.163
				0.064	0.566	0.159	0.163
				0.618	0.278	0.153	0.274
				0.109	0.272	0.045	0.116
				0.175	0.056	0.058	0.342
				0.67	0.102	0.041	0.247
				0.289	0.608		0.216
				0.14	0.477	Replicate #3	0.168
				0.04	0.107	0.043	0.2
				0.205	0.584	0.053	0.158
				0.154	0.41	0.086	0.163
				0.109	0.319	0.06	0.084
				0.033	0.221	0.148	0.037
				0.102	0.408	0.086	0.099
				0.21	0.374	0.146	0.102
				0.083	0.314	0.313	0.558
				0.161	0.06	0.422	0.616
				0.146	0.454	0.366	0.142
				0.107	0.539	0.204	0.77
				0.084		0.34	0.465
				0.194	Replicate #2	0.212	0.216
				0.107	0.241	0.664	0.32
				0.175	0.321	0.488	0.286
				0.057	0.627	0.627	0.043
				0.101	0.042	0.162	0.185
				0.045	0.031	0.092	0.265
				0.154	0.084	0.33	0.04
				0.162	0.034	0.108	0.336
				0.179	0.092	0.14	0.545
				0.051	0.401	0.028	0.37
				0.164	0.138	0.059	0.083
				0.549	0.149	0.146	0.277
				0.05	0.153	0.24	0.24
				0.455	0.07	0.371	0.376
				0.201	0.05	0.067	0.521
				0.31	0.042	0.249	0.043
				0.185	0.115	0.504	0.24
				0.79	0.18	0.534	0.425
				0.238	0.29	0.039	0.163
				0.172	0.495	0.177	0.81
				0.241	0.688	0.236	0.249
				1.122	0.131	0.68	0.521
				0.386	0.206	0.16	0.431
				0.658	0.33	0.269	0.24
				0.052	0.137	0.183	0.517
				0.066	0.03	0.288	0.186
				0.156	0.195	0.238	0.579
				0.031	0.043	0.074	0.248
				0.04	0.033	0.044	0.15
				0.409	0.089	0.098	0.212
				0.371	0.325	0.257	0.1
				0.265	0.125	0.108	1.137
				0.695	0.049	0.572	0.111
				0.04	0.177	0.287	0.568
				0.198	0.085	0.056	0.993
				0.291	0.102	0.258	0.798
				0.09	0.033	0.149	0.743
				0.165	0.095	0.237	0.065
				0.763	0.069	0.143	0.035
				0.076	0.135	0.448	0.043
				0.227	0.04	0.229	0.035
				0.069	0.098	0.234	0.043
				0.206	0.423	0.099	0.052
				0.347	0.141	0.383	0.09
				0.267	0.039	0.272	0.499
				0.105	0.194	0.313	0.377
				0.047	0.066	0.026	0.177
				0.209	0.056	0.108	0.303
				0.056	0.115	0.629	0.325
				0.375	0.42	0.151	0.126
				0.125	0.088	0.115	0.24
				0.309	0.033	0.263	0.17
				0.121	0.039	0.113	0.358
				0.07	0.134	0.098	0.078
				0.055	0.129	0.3	0.081
				0.07	0.031	0.077	0.041
				0.037	0.14	0.073	0.325
				0.07	0.039	0.074	0.347
				0.107	0.132	0.159	0.055
				0.055	0.054	0.089	0.07
				0.037	0.103	0.114	0.059
				0.176	0.058	0.029	0.085
				0.048	0.141	0.066	0.044
				0.169	0.049	0.303	0.074
				0.033	0.056	0.194	0.458
				0.096	0.063	0.222	0.037
				0.184	0.079	0.079	0.222
				0.055	0.251	0.071	0.118
				0.059	0.168	0.156	0.055
				0.158	0.101	0.081	0.27
				0.077	0.085	0.112	0.214
				0.051	0.182	0.114	0.207
				0.062	0.081	0.071	0.125
				0.037	0.164	0.099	0.046
				0.092	0.146	0.141	0.053
				0.033	0.034	0.037	0.089
				0.085	0.043	0.186	0.085
				0.081	0.047	0.088	0.039
				0.059	0.067	0.054	0.052
				0.092	0.251	0.429	0.057
				0.096	0.076	0.487	0.066
				0.07	0.074	0.186	0.073
				0.04	0.03	0.077	0.052
				0.085	0.035	0.349	0.055
				0.92	0.046	0.119	0.053
				0.092	0.071	0.36	0.247
				0.126	0.049	0.195	0.312
				0.107	0.044	0.039	0.809
				0.569	0.047	0.28	0.121
				0.041	0.056	0.296	0.059
				1.257	0.076	0.215	0.397
				0.177	0.192	0.356	0.394
				0.141	0.057	0.045	0.745
				0.575	0.108	0.054	0.094
				0.045	0.147	0.154	0.206
				0.034	0.235	0.122	0.241
				0.101	0.134	0.034	1.083
				0.061	0.169	0.167	0.156
				0.119	0.049	0.185	0.196
				0.044	0.15	0.193	0.172
				0.045	0.114	0.073	0.095
				0.067	0.039	0.333	0.207
				0.149	0.036	0.057	0.061
				0.059	0.417	0.086	0.056
				0.372	0.263	0.029	0.08
				0.086	0.05	0.287	0.045
				0.574	0.033	0.037	0.122
					0.185	0.053	0.231
				0.722	0.066	0.035	0.072
				0.093	0.137	0.208	0.141
				0.533	0.383	0.07	0.223
				0.125	0.074	0.129	0.049
				0.581	0.073	0.035	0.04
				1.078	0.327	0.16	0.062
				0.888	0.269	0.248	0.294
				0.476	0.16	0.044	0.042
				0.5	0.053	0.033	0.368
				0.953	0.165	0.105	0.05
				0.303	0.089	0.077	0.118
				0.085	0.121	0.16	0.11
				0.044	0.093	0.029	0.05
				0.944	0.382	0.035	0.06
				0.141	0.202	0.259	0.052
				0.751	0.05	0.046	0.046
				0.149	0.061	0.121	0.046
				0.032	0.034	0.149	0.338
				0.235	0.045	Replicate #4	0.084
				0.032	0.067	0.369
				0.049	0.183	0.177	Replicate #3
				0.534	0.138	0.355	0.037
				0.736	0.057	0.336	0.067
				0.55	0.061	0.042	0.085
				0.178	0.079	0.126	0.046
				0.51	0.063	0.35	0.096
				0.267	0.03	0.061	0.204
				0.283	0.049	0.429	0.026
				0.227	0.07	0.794	0.07
				0.414	0.08	0.565	0.054
				0.03	0.045	0.28	0.035
				0.253	0.103	0.196	0.061
				1.515	0.039	0.073	0.11
				0.04	0.039	0.113	0.054
				0.338	0.041	0.09	0.156
				0.515	0.063	0.157	0.074
				0.5	0.059	0.13	0.086
				0.662	0.044	0.18	0.112
				0.268	0.044	0.29	0.058
				0.904	0.186	0.06	0.134
				0.101	0.081	0.123	0.055
				1.02	0.053	0.057	0.029
				0.894	0.089	0.11	0.06
				0.484	0.036	0.147	0.061
				0.173	0.153	0.067	0.09
				0.046	0.549	0.137	0.044
				0.093	0.073	0.14	0.03
				0.413	0.042	0.037	0.066
				0.206	0.042	0.446	0.121
				0.181	0.052	0.087	0.027
				0.168	0.052	0.17	0.038
				0.088	0.085	0.037	0.07
				0.181	0.109	0.04	0.033
				0.558		0.067	0.03
				0.684	Replicate #3	0.253	0.056
				0.409	0.134	0.087	0.073
				0.045	0.041	0.6	0.061
				0.201	0.072	0.06	0.04
				0.074	0.031	0.153	0.03
				0.164	0.217	0.15	0.045
				0.424	0.041	0.233	0.072
				0.357	0.134	1.392	0.229
				0.067	0.083	0.565	0.068
				0.617	0.093	0.42	0.042
				0.297	0.041	1.129	0.06
				0.067	0.031	1.72	0.206
				0.126	0.155	0.937	0.168
				0.052	0.093	0.333	0.071
				0.178	0.175	0.136	0.163
				0.156	0.124	0.083	0.057
				0.119	0.031	0.53	0.126
				0.275	0.04	0.608	0.042
				0.268	0.146	0.958	0.046
				0.394	0.199	2.009	0.235
				0.149	0.04	0.565	0.027
				0.528	0.066	1.79	0.026
				0.654	0.066	1.112	0.07
				0.283	0.332	0.35	0.124
				0.312	0.04	1.816	0.046
				0.059	0.04	1.142	0.117
				0.045	0.066	0.595	0.046
				0.171	0.066	0.829	0.211
				0.186	0.04	0.611	0.057
					0.439	0.795	0.051
				Replicate #3	0.213	0.148	0.059
				0.71	0.08	0.052	0.098
				0.813	0.053	0.279	0.147
				0.19	0.173	3.155	0.181
				0.416	0.069	0.611	0.051
				0.224	0.098	1.339	0.041
				0.267	0.039	0.029	0.04
				2.186	0.069	0.948	0.065
				0.193	0.039	0.185	0.101
				0.033	0.029	0.772	0.116
				0.051	0.029	0.947	0.128
				0.377	0.284	0.954	0.046
				0.388	0.049	0.262	0.062
				0.248	0.029	0.296	0.061
				0.029	0.088	0.223	0.056
				0.08	0.039	0.279	0.244
				0.04	0.039	0.245	0.141
				0.059	0.059	0.175	0.35
				0.377	0.029	0.213	0.137
				0.247	0.026	0.101	0.743
				0.12	0.071	0.1	0.135
				0.069	0.035	0.047	0.82
				0.254	0.026	0.051	0.166
				0.064	0.044	0.827	0.025
				0.143	0.035	0.465	0.039
				0.289	0.194	0.164	0.081
				0.215	0.053	0.137	0.522
				0.038	0.115	0.08	0.236
				0.223	0.115	0.051	0.255
				0.245	0.035	0.137	0.223
				0.324	0.071	0.425	0.279
				0.318	0.026	0.22	0.298
				0.061	0.044	0.053	0.419
				0.246	0.035	0.229	0.099
				0.153	0.044	0.319	0.066
				0.153	0.079	0.172	0.03
				0.321	0.194	0.337	0.093
				0.14	0.106	0.475	0.24
				0.444	0.035	0.164	0.34
				0.468	0.079	0.259	0.039
				0.371	0.035	0.131	0.026
				0.385	0.115	0.148	0.146
				0.09	0.026	0.09	0.172
				0.273	0.217	0.443	0.08
				0.302	0.095	0.062	0.155
				0.252	0.027	0.064	0.098
				0.388	0.048	0.141	0.094
				0.256	0.069	0.135	0.067
				0.219	0.032	0.186	0.067
				0.39	0.042	0.324	0.071
				0.067	0.032	0.771	0.104
				0.07	0.032	0.039	0.143
				0.349	0.048	0.42	0.161
				0.218	0.095	0.124	0.067
				0.155	0.26	0.109	0.118
				0.114	0.137	0.045	0.071
				0.203	0.28	0.084	0.247
				0.17	0.631	0.129	0.049
				0.328	0.039	0.092	0.169
				0.208	0.202	0.045	0.196
				0.11	0.163	0.159	0.059
				0.054	0.052	0.032	0.045
				0.25	0.163	0.214	0.294
				1.574	0.169	0.131	0.029
				0.492	0.299	0.03	0.139
				1.148	0.059	0.107	0.212
				0.505	0.039	0.081	0.059
				0.353	0.254	0.139	0.025
				1.729	0.046	0.45	0.036
				0.219	0.044	0.326	0.027
				0.04	0.15	0.189	0.164
				0.484	0.062	0.195	0.081
				0.038	0.035	0.171	0.072
				0.32	0.141	0.223	0.038
				1.089	0.044	0.351	0.067
				0.589	0.026	0.199	0.04
				0.258	0.026	0.193	0.088
				1.164	0.026	0.182	0.072
				0.422	0.062	0.135	0.043
				0.424	0.026	0.212	0.125
				1.158	0.088	0.261	0.038
				0.68	0.071	0.24	0.087
				0.605	0.318	0.285	0.029
				0.132	0.15	0.141	0.063
				0.489	0.026	0.049	0.052
				0.447	0.035	0.306	0.027
				0.944	0.141	0.056	0.07
				1.15	0.044	0.112	0.074
				0.213	0.062	0.096	0.152
				1.237	0.371	0.321	0.209
				0.274	0.064	0.681	0.335
				0.051	0.032	0.081	0.055
				1.395	0.16	0.032	0.485
				0.534	0.026	0.088	0.123
				0.447	0.026	0.458	0.103
				0.363	0.07	0.043	0.405
				0.963	0.07	0.47	0.038
				0.663	0.07	0.178	0.092
				0.16	0.032	0.366	0.186
				0.266	0.026	0.066	0.176
				0.34	0.026	0.346	0.21
				0.118	0.064	0.18	0.194
				0.275	0.08	0.423	0.258
				0.817	0.04	0.8	0.173
				0.393	0.064	0.187	0.034
				0.322	0.032	0.229	0.153
				0.121	0.045	0.419	0.207
				0.182	0.026	0.187	0.36
				0.102	0.032	0.028	0.358
				0.135	0.038	0.354	0.085
				0.159	0.025	0.813	0.134
				0.147	0.051	0.482	0.049
				0.299	0.025	0.565	0.124
				0.182	0.076	0.036	0.278
				0.427	0.038	0.146	0.117
				0.059	0.025	0.135	0.129
				0.117	0.038	0.231	0.297
				0.064	0.064	0.205	0.19
				0.779	0.064	0.028	0.11
				0.227	0.025	0.255	0.09
				0.154	0.025	0.334	0.273
				0.037	0.038	0.501	Replicate #4
				0.326	0.025	0.091	0.031
				0.371	0.025	0.164	0.461
				0.657	0.038	0.13	0.141
				0.054	0.051	0.259	0.039
				0.225	0.025	0.097	0.089
				0.156	0.114	0.078	0.065
				0.294	0.025	0.631	0.072
				0.548	0.038	0.039	0.096
				0.444	0.038	0.048	0.098
				0.107	0.038	0.075	0.05
				0.053	0.038	0.19	0.137
				0.091	0.038	0.031	0.05
				0.786	0.051	0.243	0.094
				0.204	0.038	0.082	0.244
				0.442	0.051	0.187	0.148
				0.28	0.102	0.05	0.078
				0.869	0.025	0.087	0.054
				0.164	0.038	0.532	0.196
				0.15	0.038	0.367	0.748
				0.373	0.038	0.417	0.261
				0.872	0.076	0.71	0.113
				0.421	0.076	0.054	0.631
				0.097	0.038	0.427	0.102
				0.615	0.051	0.028	0.546
				0.284	0.025	0.101	0.339
				0.041	0.038	0.257	0.442
				0.809	0.076	0.045	0.052
				0.119	0.114	0.189	0.35
				0.304	0.025	0.065	0.433
				Replicate #4	0.051	0.645	0.191
				0.467	0.025	0.204	0.317
				0.891	0.025	1.328	0.518
				1.024	0.038	0.434	0.257
				1.411	0.025	2.519	0.126
				0.247	0.102	0.251	0.346
				0.646	0.146	1.702	0.146
				0.826	0.027	1.007	0.226
				1.545	0.057	0.059	0.146
				1.523	0.119	0.357	0.048
				0.55	0.119	0.546	0.387
				0.745	0.195	0.08	0.054
				0.29	0.663	0.652	0.746
				0.035	0.071	0.461	0.129
				0.057	0.38	0.775	0.352
				0.124	0.141	0.033	0.094
				0.624	0.248	0.626	0.056
				1.122	0.875	0.48	0.127
				0.997	0.036	1.739	0.461
				0.54	0.027	0.638	0.183
				0.212	0.077	0.941	0.04
				0.941	0.068	0.248	0.029
				1.267	0.032	1.498	0.073
				0.158		0.365	0.056
				0.538	Replicate #3	0.905	0.072
				1.029	0.154	1.029	0.488
				0.265	0.053	0.038	0.156
				0.036	0.121	0.163	0.403
				0.06	0.194	0.919	0.051
				0.034	0.065	0.436	0.039
				0.653	0.153	0.272	0.15
				0.858	0.222	0.491	0.031
				0.321	0.074	0.562	0.15
				0.924	0.183	0.443	0.349
				0.276	0.083	0.56	0.312
				0.885	0.036	0.201	0.241
				0.069	0.092	0.972	0.054
				0.081	0.103	1.286	0.336
				0.439	0.096		0.107
				0.436	0.12		0.14
				0.66	0.034		0.281
				0.121	0.111		0.091
				0.361	0.132		0.04
				0.586	0.065		0.292
				0.357	0.141		0.083
				0.216	0.066		0.151
				0.127	0.112		0.029
				0.437	0.105		0.518
				0.036	0.131		0.269
				0.28	0.398		0.191
				0.099	0.263		0.064
				0.117	0.086		0.071
				0.276	0.151		0.049
				1.701	0.119		0.08
				0.097	0.168		0.127
				0.06	0.037		0.243
				0.127	0.055		0.082
				0.623	0.099		0.078
				0.075	0.088		0.08
				0.828	0.132		0.087
				0.314	0.107		0.102
				0.347	0.353		0.029
				0.421	0.28		0.037
				0.03	0.055		0.122
				0.59	0.048		0.183
				0.089	0.055		0.032
				0.484	0.035		0.064
				0.044	0.075		0.118
				0.248	0.093		0.143
				0.659	0.037		0.032
				0.355	0.059		0.151
				0.151	0.043		0.147
				0.427	0.038		0.155
				0.707	0.051		0.036
				0.369	0.029		0.182
				0.32	0.176		0.037
				0.191	0.038		0.13
				0.214	0.356		0.06
				0.289	0.136		0.059
				0.577	0.153		0.048
				0.26	0.246		0.08
				0.863	0.399		0.49
				0.985	0.074		0.127
				0.223	0.102		0.088
				0.154	0.034		0.982
				0.243	0.184		0.96
				0.686	0.137		0.32
				0.483	0.144		0.038
				1.05	0.106		0.078
				0.226	0.109		0.191
				0.486	0.066		0.334
				0.037	0.342		0.296
				0.109	0.116		0.519
				0.306	0.124		0.164
				1.103	0.096		0.371
				0.043	0.129		0.428
				0.291	0.121		1.487
				0.397	0.067		0.503
				0.197	0.035		0.36
				0.46	0.158		0.602
				0.997	0.032		0.299
				0.703	0.033		0.498
				1.231	0.033		0.543
				0.297	0.196		0.033
				0.771	0.082		0.058
				0.263	0.056		0.204
				0.097	0.096		0.061
				0.057	0.14		0.075
				1.511	0.133		0.056
				0.237	0.049		0.061
				0.657	0.544		0.034
				0.174	0.092		0.22
				0.483	0.058		0.069
				0.56	0.201		0.053
				1.051	0.064		0.541
				0.117	0.158		0.13
				0.868	0.121		0.142
				0.254	0.124		0.036
				0.586	0.231		0.06
				0.066	0.174		0.129
				0.546	0.264		0.094
				0.671	0.077		0.255
				0.089	0.229		0.038
				0.217	0.185		0.06
				0.56	0.324		0.246
				0.289	0.091		0.361
				0.089	0.119		0.229
				0.086	0.107		0.335
				0.334	0.094		0.12
				0.311	0.071		0.061
				0.169	0.046		0.046
				0.163	0.199		0.215
				0.626	0.249		0.111
				0.543	0.141		0.341
				0.209	0.207		0.204
				0.149	0.08		0.195
				0.194	0.061		0.157
				0.23	0.16		0.094
				0.588	0.089		0.368
				0.191	0.203		0.273
				0.086	0.066		0.141
				0.089	0.155		0.08
				0.106	0.262		0.449
				0.174	0.268		0.338
				0.07	0.046		0.106
				1.139	0.072		0.152
				0.426	0.033		0.199
				0.065	0.185		0.405
				0.113	0.327		0.233
				0.04	0.081		0.4
				0.043	0.196		0.335
				0.03	0.138		0.042
				0.098	0.17		0.041
				0.055	0.124		0.37
				0.203	0.146		0.458
				0.043	0.09		0.444
				0.09	0.09		0.127
				0.64	0.203		0.079
				0.349	0.127		0.065
				0.12	0.07		0.139
				0.271	0.153		0.041
				0.073	0.273		0.361
				0.04	0.393		0.065
				0.043	0.118		0.198
				0.035	0.447		0.206
				0.263	0.03		0.066
				0.3	0.305		0.204
				0.035	0.05		0.214
				0.143	0.164		0.101
				0.07	0.066		0.095
				0.09	0.135		0.104
				0.035	0.111		0.035
				0.061	0.089		0.061
				0.075	0.183		0.071
				0.189	0.229		0.146
				0.827	0.297		0.144
				0.206	0.033		0.032
				0.068	0.57		0.065
				0.476	0.035		0.183
				0.546	0.059		0.097
				0.082	0.419		0.698
				0.848	0.155		0.095
				0.509	0.24		0.075
				0.245	0.266		0.2
				0.521	0.176		0.043
				0.35	0.133		0.041
				0.638	0.056		0.031
				0.68	0.124		0.143
				0.057	0.304		0.642
				0.093	0.032		0.285
				0.062	0.146		0.1
				0.15	0.206		0.145
				0.042	0.289		0.31
				0.034	0.092		0.131
				0.15	0.388		0.364
				0.088	0.244		0.409
				0.031	0.221		0.397
				0.088	0.109		0.871
				0.031	0.221		0.388
				0.034	0.287		0.157
				0.076	Replicate #4		0.275
				0.062	0.031		0.229
				0.113	0.164		0.453
				0.127	0.218		0.783
				0.088	0.242		0.308
				0.057	0.103		0.115
				0.158	0.063		0.064
				0.173	0.04		0.045
				0.076	0.059		0.086
				0.031	0.326		0.078
				0.074	0.237		0.049
				0.068	0.033		0.029
				0.147	0.067		0.057
				0.057	0.037		0.088
				0.156	0.037		0.301
				0.076	0.041		0.334
				0.096	0.035		0.039
				0.042	0.047		0.123
				0.107	0.051		0.031
				0.113	0.169		0.195
				0.17	0.105		0.084
				0.037	0.066		0.049
				0.045	0.25		0.119
				0.065	0.038		0.096
				0.105	0.079		0.189
				0.06	0.04		0.055
				0.062	0.048		0.121
				0.133	0.073		0.035
				0.074	0.38		0.051
				0.062	0.295		0.09
				0.031	0.13		0.035
				0.167	0.213		0.113
				0.054	0.091		0.055
				0.041	0.05		0.111
				0.317	0.067		0.037
				0.059	0.079		0.215
				0.086	0.06		0.133
				0.919	0.262		0.226
				0.311	0.113
				0.411	0.135
				1.345	0.077
				0.23	0.069
				0.164	0.231
				0.133	0.04
				0.187	0.227
				0.104	0.12
				0.058	0.079
				0.058	0.34
				0.51	0.159
				0.495	0.311
				0.733	0.116
				1.047	0.068
				0.901	0.056
				0.547	0.412
				1.11	0.056
				0.987	0.48
				0.032	0.094
				0.49	0.178
				0.076	0.763
				1.542	0.121
				0.514	0.155
				0.058	0.267
				0.728	0.138
				1.318	0.123
				1.614	0.357
				0.121	0.298
				0.436	0.041
				0.947	0.437
				0.727	0.054
				0.312	0.16
				0.469	0.064
				0.163	0.592
				0.828	0.24
				0.228	0.382
				0.767	0.155
				0.095	0.15
				0.177	0.072
				0.765	0.03
				1.31	0.261
				0.187	0.743
				0.662	0.094
				0.751	0.092
				0.646	0.241
				1.325	0.185
				0.846	0.238
				0.639	0.436
					0.239
					0.426
					0.163
					0.148
					1.722
					0.032
					0.594
					0.205
					0.698
					0.041
					0.072
					0.043
					0.078
					0.045
					0.087
					0.155
					0.065
					0.076
					0.041
					0.057
					0.041
					0.038
					0.048
					0.03
					0.052
					0.115
					0.04
					0.22
					0.08
					0.04
					0.041
					0.04
					0.038
					0.055
					0.162
					0.054
					0.093
					0.039
					0.143
					0.122
					0.183
					0.099
					0.072
					0.084
					0.066
					0.05
					0.038
					0.219
					0.131
					0.034
					0.048
					0.168
					0.066
					0.201
					0.106
					0.106
					0.039
					0.259
					0.208
					0.127
					0.119
					0.247
					0.113
					0.165
					0.22
					0.187
					0.067
					0.104
					0.148
					0.062
					0.146
					0.05
					0.139
					0.076
					0.158
					0.171
					0.202
					0.157
					0.133
					0.07
					0.309
					0.05
					0.254
					0.355
					0.055
					0.096
					0.159
					0.182
					0.194
					0.104
					0.221
					0.055
					0.042
					0.373
					0.419
					0.197
					0.05
					0.102
					0.096
					0.076
					0.582
					0.035
					0.06
					0.235
					0.252
					0.032
					0.034
					0.228
					0.098
					0.113
					0.033
					0.032
					0.046
					0.051
					0.081
					0.058
					0.094
					0.117
					0.214
					0.184
					0.296
					0.041
					0.083
					0.093
					0.122
					0.634
					0.43
					0.069
					0.076
					0.065
					0.063
					0.299
					0.106
					0.275
					0.562
					0.162
					0.177
					0.105
					0.145
					0.674
					0.034
					0.091
					0.032
					0.182
					0.23
					0.056
					0.744
					0.437
					0.262
					0.756
					0.636
					0.415
					0.049
					0.067
					0.066
					0.069
					0.054
					0.04
					0.059
					0.043
					0.033

## Sheet: Panel E
			ALIX Intensity at Mibodies With and Without ACBs Present in Cells
Hours post-thymidine			12 hours		14 hours		16 hours
			ACB Absent	ACB Present	ACB Absent	ACB Present	ACB Absent	ACB Present
			Replicate #1	Replicate #1	Replicate #1	Replicate #1	Replicate #1	Replicate #1
			17.61	12.72	56.41	21.53	50.48	6.21
			13.54	6.66	21.79	16.71	2	11.33
			32.91	23.18	95.7	16.17	30.16	18.2
			51.12	14.19	62.25	29.57	34.26	25.98
			50	13.05	24.91	31.06	57.89	11.08
			33.99	5.73	34.09	27.63	28.39	13.35
			8.7	13.93	79.46	37.32	18.38	14.13
			30.59	15.64	26.78	21.18	55.75	20.85
			18.06	3.43	139.75	6.32	30.6	8.1
			9.7	5.29	56.21	24.01	0.11	12.14
			26.74	17.38	27.19	6.85	53.86	32.08
			13.34	10.7	68.24	22.63	66.6	12.38
			34.9	2.95	26.94	2.54	46.6	13.53
			22.26	10.58	60.46	16.6	31.22	22.24
			19.91	11.28	32.43	23.87	34.32	20.89
			Replicate #2	7.41	116.98	14.04	69.05	17.96
			11.21	5.24	15.36	11.54	72.77	19.13
			13.3	6.21	23.51	24.12	73.33	16.55
			15.72	35.83	145.37	34.86	4.21	21.17
			11.58	8.11	15.99	6.93	26.07	28.67
			11.24	30.87	29.43	16.97	18.66	25.68
			9	Replicate #2	36.42	29.66	19.77	25.24
			6.31	5.39	22.86	16.85	9.63	18.04
			13.4	4.49	68.47	20.66	58.73	8.78
			13.99	4.93	42.26	30.53	44.24	28.24
			15.88	3.22	41.13	41.35	46.3	23.2
			7.67	4.64	Replicate #2	10.23	Replicate #2	15.05
			6.08	4.78	4.61	15.58	13.53	8.2
			8.7	3.75	7.39	9.65	18.48	8.7
			3.7	6.4	8.59	31.94	8.73	17.42
			9.39	5.14	31.81	20.16	33.97	19.01
			Replicate #3	11.07	27.98	21.88	15.23	20.92
			43.32	4.97	16.43	28.49	8.73	18.39
			41.13	0.59	12.52	26.53	23.46	18.02
			37.74	7.24	6.49	15.27	23.67	16.85
			54.4	4.59	21.03	8.08	45	12.18
			84.96	5.45	28.69	15.5	43.67	24.35
			29.54	5.87	16.88	8.43	12.83	20
			70.93	6.29	10.98	18.72	18.67	33.57
			56.66	3.85	12.96	16.9	23.22	9.86
				5.81	22.02	29.46	154.67	16.13
				6.64	23	16.25	75.83	12.69
				6.79	1.14	11.24	12	Replicate #2
				6.62	13.05	34.64	16.17	8.73
				2.64	Replicate #3	31.93	Replicate #3	17.6
				1.09	33.14	20.6	68.96	8.73
				2.31	18.37	19.36	57.42	13.53
				3.58	62.32	16.37	44.23	13.37
				3.08	41.11	27.3	32.95	5.94
				Replicate #3	37.62	11.26	22.2	11.14
				19.93	60.56	18.67	32.79	8.73
				7.64	20.06	18.21	37.44	12.67
				16.89	68.66	26.44	20.33	7.98
				6.98	81.08	Replicate #2	84.43	16.17
				20.92		3.22	76.82	11.11
				9.1		0.14	28.26	31.33
				16.75		12.03	16.1	23.44
				18.53		5.09	128.16	15.67
						7.78	70.68	19.67
						3.94	93.66	9.33
						3.89		11.83
						3.23		12.17
						3.02		13.17
						4.51		4.67
						3.85		13.33
						1.7		9.56
						8.56		15
						7.86		22.75
						5.18		21.33
						1.34		Replicate #3
						6.49		21.37
						5.81		33.27
						6.18		27.36
						1.11		46.68
						3.94		23.1
						8.96		0
						4.96		23.55
						3.44		18.35
						7.17		23.53
						7.54		22.04
						6.91		25.29
						4.22		46.46
						6.61		25.19
						3.47		8.24
						4.91		22.07
						8.73		15.53
						1.69		44.63
						7.6		29.41
						5.92		30.05
						9.75		16.97
						4.16		7.02
						6.42		20.63
						8.61		50.41
						7.78		18.13
						8.73		28.99
						6.36		5.67
						5.69		33.08
						3.47		34.29
						Replicate #3		40.44
						6.87		21.69
						38.47		37.3
						16		31.18
						7.28
						18.17
						3.58
						4.74
						29.33
						24.94

## Sheet: supplement 1B
				% Cell population in cytokinesis failure
				Multinucleate			Failed Bridge			Multi-Failure
				Replicate #1	#2	#3	Replicate #1	#2	#3	Replicate #1	#2	#3
			siCon siCon	1.81	0.27	0.56	0	0	0	0.3	0	0
			siCon siNups	2.25	0.88	0.69	0	0	0	0.28	0	0
			siALIX siCon	36.06	24.93	19.85	7.88	7.54	3.61	5.76	2.32	1.55
			siALIX siNups	12.28	4.06	12.2	7.6	3.84	2.93	1.75	0.45	0

## Sheet: supplement 1D
				Number of ACBs per Midbody-stage Cell
				pSC35		pAurB
				siCon/siNups	siALIX/siNups	siCon/siNups	siALIX/siNups
				Replicate #1	Replicate #1	Replicate #1	Replicate #1
				17	14	9	19
				16	24	8	21
				22	13	14	35
				12	18	8	22
				14	26	16	22
				17	21	6	24
				14	25	12	26
				12	26	5	15
				12	27	12	5
				7	16	12	Replicate #2
				12	19	13	31
				6	Replicate #2	15	16
				Replicate #2	18	Replicate #2	17
				13	9	9	12
				13	16	10	7
				9	6	1	28
				6	9	11	13
				14	21	2	13
				18	14	12	13
				5	10	7	3
				13	21	11	13
				17	21	3	Replicate #3
				11	10	6	21
				18	6	14	18
				14		Replicate #3	21
				7	16	6	20
				16	17	8	15
					15	16	12
				17	24	11	8
				12	11	5	15
				14	15	15	22
				10	16	8	13
				15	5	19	19
				15	19	15	Replicate #4
				Replicate #3	23	11	17
				8	24	13	13
				21	13	11	15
				12	5	Replicate #4	8
				20	Replicate #3	13	27
				13	19	29	34
				12	19	13	19
				7	14	7	22
				12	19	16	17
				13	14	26	20
				10	14	33	26
				22	18	24	17
				Replicate #4	18	18	33
				13	23	9
				9	17	16
				16	Replicate #4	14
				34	20	10
				14	32	7
				11	25	3
				13	17	7
				28	30	9
				18	19
				15	23
				15	26
				30	15
				15	17
				12	12
				21	9

## Sheet: supplement 2B
			ALIX Intensity in ACBs per ACB Area
			siCon/siNups	siALIX/siNups
			Replicate #1	Replicate #1
			3407.16	3233.94
			224.33	545.33
			660.15	838.54
			791.32	517.6
			1063.52	797.92
			638.3	813.06
			864.83	473.4
			1263	473.24
			1764.78	988.67
			3445.76	1083.26
			4130.2	1061.74
			3676	Replicate #2
			Replicate #2	1318.73
			8794.52	8775.15
			4105.26	1888.11
			2286.04	2353.58
			3902.86	6784.09
			6624.16	3340.47
			5546.74	3235.58
			17515.7	1395.1
			3563.08	4374.82
			4242.46	4087.93
			10788.7	1833.64
			3856.42	3505.97
			3538.72	385.34
			42702.2	258.02
			31938.3	591.08
			2377.66	321.22
			846.85	1404.33
			2203.49	1698.18
			1867.25	991.57
			1317.48	1147.11
			1230.24	792.46
			Replicate #3	702.93
			10509.9	869.66
			12437	3968.94
			15122.2	2355.8
			8188.01	Replicate #3
			7191.16	6118.8
			7745.32	14203
			6594.44	8690.66
			17913.1	9255.58
			13431.1	3975.85
			16695.5	5242.62
			17760.6	7199.11
			Replicate #4	7163.86
			7280.08	2978.02
			12064.6	2238.64
			12739.9	Replicate #4
			4790.71	4809.41
			2953.71	4805.75
			3203.03	1921.05
			3319.97	1150.12
			2172.46	1778.69
			4033.48	2507.99
			3273.16	2470.83
			1889.84	3932.15
			4430.54	3733.35
			3960.94	1787.55
			5357.02	1075.18
				3110.27

## Sheet: supplement 2D
			ALIX Intensity in MIGs per MIG Area
			siCon/siCon	siALIX/siCon
			Replicate #1	Replicate #1
			288.82	262.17
			0	0
			619.48	949.77
			1141.6	0
			272.72	0
			1038.09	0
			358.47	6.57
			6578.58	3155.92
			1986.66	4736.55
			0	594.17
			0	64.09
			0	365.42
			Replicate #2	Replicate #2
			7554.93	1085.76
			467.92	3275.85
			2122.53	1187.25
			1225	Replicate #3
			2371.56	2195.93
			92.1	879.83
			0	870.52
			347.55	526
			583.06	990.37
			949.26	435.33
			280.32	0
			0	0
			Replicate #3	0
			0	276.75
			3065.05	232.77
			0	212.39
			8981.5	560.18
			163.99	0
			0	476.35
			59.2	128.47
			1190.55	Replicate #4
			3793.47	802.28
			3419.39	10211.1
			1852.61	4485.97
			349.21	612.02
			Replicate #4	1548.36
			2244.77	1475.5
			11145.6	4719.35
			1970.47	1646.67
			2413.87	454.77
			405.1	12.05
			93.12	1089.65
			164.99	4543.08
			407.3
			3525.16
			818.82
			2176.03
			1532.81
			0
