# Supplementary material for: Identification of abscission checkpoint bodies as structures that regulate ESCRT factors to control abscission timing
Source: eLife. 2021 Aug 4;10:e63743. doi: 10.7554/eLife.63743 (PMC8437436; doi:10.7554/eLife.63743)
Supplement: Supplementary file 1. [file elife-63743-supp1.xlsx]

## Sheet: Antibodies Used in Publication
			Protein	Host Organism	Dilution	Conditions	Source	Product # (If Applicable)	RRID
			a-tubulin	Rabbit	IF: 1:1000	Fix: Methanol, PFA, PHEM	Abcam	ab18251	AB_2210057
			a-tubulin	Rat	IF: 1:1000	Fix: Methanol, PFA, PHEM	Accurate Chem. & Scientific Corp.	YSRTMCA77P	AB_2210201
			a-tubulin	Chicken	IF: 1:400	Fix: PFA, PHEM	Abcam	Ab89984	AB_10672056
			a-tubulin	Chicken	IF: 1:1500	Fix: Methanol, PFA, PHEM	Synaptic Systems	302 206	AB_2782986
			ALIX	Rabbit	IF: 1:500 WB 1:1000	Fix: Methanol, PFA, PHEM	Covance	UT375	AB_2892637
			ALIX 2H12	Mouse	IF: 1:250	Fix: Methanol, PHEM	Santa Cruz	sc-53539	AB_673820
			CEP55	Rabbit	IF:1:1000	Fix: -20 Methanol 10 min, NH4Cl 15 min, 0.2% Triton-X 7 min	Francis Barr (Bastos and Barr, 2010)	N/A	N/A
			CHMP4B	Rat	IF: 1:400	Fix: PFA, PHEM	Covance	UT757	AB_2892639
			CHMP4C	Rabbit	IF: 1:100	Fix: PHEM	Abcam	﻿ab155668,	AB_2892638
			CHMP4C	Rabbit	WB 1:500	WB: Nitrocellulose 10-12% SDS Gel	Juan Martin-Serrano (Sadler et al., 2018)	Rabbit-80	N/A
			DDX6	Rabbit	IF: 1:400	Fix: PFA	Bethyl Laboratories	A300-461A	AB_2277216
			EEA1	Mouse	IF: 1:500	Fix: Methanol	Santa Cruz	sc-137130	AB_2246349
			G3BP1	Mouse	IF: 1:500	Fix: Methanol	Santa Cruz	sc-365338	AB_10846950
			Giantin	Mouse	IF: 1:1000	Fix: Methanol	Abcam	ab37266	AB_880195
			HA	Mouse	IF: 1:400	Fix: Methanol	Cell Signaling	2367	AB_10691311
			HSP90	Mouse	WB: 1:10,000	WB: PVDF or Nitrocellulose	Santa Cruz	sc-13119	AB_675659
			IST1	Rabbit	IF:1:500	Fix: Methanol	Covance (Affinity Purified)	UT560	AB_2892640
			LAMP1	Mouse	IF: 1:500	Fix: Methanol, PHEM	Santa Cruz	sc-18821	AB_626854
			Lap2ß	Mouse	IF: 1:100	Fix: Methanol, PHEM	Brian Burke	N/A	N/A
			LC3ß	Mouse	IF: 1:250	Fix: Methanol	Santa Cruz	sc-271625	AB_10714949
			Myc	Mouse	IF: 1:500 WB: 1:250	Fix: Methanoll/PFA WB: PVDF 10% SDS Gel	Millipore	05-724	AB_309938
			Nup153	Mouse	WB: 1:50	WB: PVDF, 5% SDS Gel	Brian Burke	SA1	N/A
			Nup50	Rabbit	WB:1:1000	WB:PVDF 10-12% SDS Gel Not suitable for IF	Katharine Ullman (Mackay et al., 2010)	N/A	AB_2892641
			pAurB	Rabbit	IF: 1:500	Fix: Methanol, PFA, PHEM	Rockland	600-401-677	AB_2061641
			pCHMP4C	Rabbit	IF: 1:500	Fix: Methanol	Pier Paulo D’avino (Capalbo et al., 2016))	N/A	N/A
			pppCHMP4C	Rabbit	IF: 1:500	Fix: Methanol, PHEM	Pier Paulo D’avino (Capalbo et al., 2016)	N/A	N/A
			PEX14	Rabbit	IF: 1:500	Fix: PFA	Millipore	ABC142
			SC35	Mouse	IF: 1:5000	Fix: Methanol,PFA PHEM	Abcam	ab11826	AB_298608
			SR domain	Mouse	IF: 1:250	Fix: Methanol, PHEM	Santa Cruz	sc-13509	AB_2185202
			SRRM2	Rabbit	IF: 1:1000	Fix: Methanol, PFA, PHEM	Thermofisher	PA5-66827	AB_2665182
			TSG101	Mouse	IF: 1:500	Fix: -20 Methanol 20 min, 0.05% Triton-X 10 min	Genetex	GTX70255	AB_373239
