# Supplementary material for: Identification of abscission checkpoint bodies as structures that regulate ESCRT factors to control abscission timing
Source: eLife. 2021 Aug 4;10:e63743. doi: 10.7554/eLife.63743 (PMC8437436; doi:10.7554/eLife.63743)
Supplement: Supplementary file 2. [file elife-63743-supp2.xlsx]

## Sheet: 2A-Plasmids
			Plasmid Name	Source/Reference	Addgene ID	Internal ID	Description
			pLVX	Gift from Don Ayer Lab (Originally from Clonetech)	N/A	WISP21-32	Dox-inducible empty vector for use in mammalian cell lines (pLVX).
			pLVX-CLK1	DNASU: HsCD00038192	174088	WISP21-7	WT-CLK1 plasmid from DNASU cloned into dox-inducible vector for use in mammalian expression. N-terminally tagged with Myc-GSSS.
			pLVX-SRRM2-mCherry	Gift from Drs. Arpan Rai and Lukas Pelkmans, University of Zurich	174089	WISP21-104	SRRM2-mCherry cloned into dox-inducible vector for inducible mammalian expression.

## Sheet: 2B-siRNAs
			Protein Target	Sense Sequence	Concentration	Min. Length of Knockdown	Reference
			ALIX	CCUGGAUAAUGAUGAAGGA	20-30 nm	72 hours	(Morita et al., 2007)
			CHMP4C	CACUCAGAUUGAUGGCACA	100 nm	72 hours	(Sadler et al., 2018)
			Control	GCAAAUCUCCGAUCGUAGA		42 hours	(Mackay et al., 2010)
			Nup153	GGACUUGUUAGAUCUAGUU	10 nm	42 hours	(Mackay et al., 2010)
			Nup50	GGAGGACGCUUUUCUGGAU	10 nm	42 hours	(Mackay et al., 2010)
