# Supplementary material for: Identification of abscission checkpoint bodies as structures that regulate ESCRT factors to control abscission timing
Source: eLife. 2021 Aug 4;10:e63743. doi: 10.7554/eLife.63743 (PMC8437436; doi:10.7554/eLife.63743)
Supplement: Supplementary file 3. [file elife-63743-supp3.xlsx]

## Sheet: P-Values
				Figure	Pairwise Comparison	P<0.05?	Adjusted p-value
				Figure 1-supplement 1A	siCon (column 1) vs siNups (column 2)	No	0.6
				Figure 1-supplement 1B	siCon 10h (black series) vs siNups 10h (blue series)	No	0.9308
					siCon 11h (black series) vs siNups 11h (blue series)	No	0.9697
					siCon 12h (black series) vs siNups 12h (blue series)	No	0.9364
					siCon 13h (black series) vs siNups 13h (blue series)	No	0.9484
					siCon 14h (black series) vs siNups 14h (blue series)	No	0.9985
					siCon 15h (black series) vs siNups 15h (blue series)	No	0.8019
					siCon 16h (black series) vs siNups 16h (blue series)	No	0.9123
				Figure 2F	siCon 11h (column 1) vs siNups 11h (column 2)	Yes	0.0056
					siCon 11h (column 1) vs siCon 16h (column 3)	No	0.9727
					siCon 16h (column 3) vs siNups 16h (column 4)	No	0.6834
					siNups 11h (column 2) vs siNups 16h (column 4)	Yes	0.0017
				Figure 2G	siCon -AurBi (column 1) vs siCon +AurBi (column 2)	No	0.9172
					siCon -AurBi (column 1) vs siNups -AurBi (column 3)	Yes	<0.0001
					siCon + AurBi (column 2) vs siNups + AurBi (column 4)	No	0.0984
					siNups – AurBi (column 3) vs siNups + AurBi (column 4)	Yes	<0.0001
				Figure 2- supplement 1D	siCon 11h (column 1) vs siNups 11h (column 2)	Yes	<0.0001
					siCon 11h (column 1) vs siCon 16h (column 3)	No	0.9244
					siCon 16h (column 3) vs siNups 16h (column 4)	No	0.678
					siNups 11h (column 2) vs siNups 16h (column 4)	Yes	<0.0001
				Figure 2- supplement 2D (All)	siCon 11h (column 1) vs siNups 11h (column 2)	Yes	<0.0001
					siCon 11h (column 1) vs siCon 16h (column 3)	No	0.6557
					siCon 16h (column 3) vs siNups 16h (column 4)	Yes	<0.0001
					siNups 11h (column 2) vs siNups 16h (column 4)	Yes	0.0281
				Figure 2- supplement 2D (Early)	siCon 11h (column 1) vs siNups 11h (column 2)	Yes	<0.0001
					siCon 11h (column 1) vs siCon 16h (column 3)	No	0.8949
					siCon 16h (column 3) vs siNups 16h (column 4)	Yes	0.0001
					siNups 11h (column 2) vs siNups 16h (column 4)	No	0.1772
				Figure 2-supplement 3C (Early)	siCon -AurBi (column 1) vs siCon +AurBi (column 2)	No	0.9978
					siCon -AurBi (column 1) vs siNups -AurBi (column 3)	Yes	<0.0001
					siCon + AurBi (column 2) vs siNups + AurBi (column 4)	No	0.9986
					siNups -AurBi (column 3) vs siNups + AurBi (column 4)	Yes	<0.0001
				Figure 2-supplement 3C. (All)	siCon -AurBi (column 1) vs siCon +AurBi (column 2)	No	0.9975
					siCon -AurBi (column 1) vs siNups -AurBi (column 3)	Yes	0.008
					siCon + AurBi (column 2) vs siNups + AurBi (column 4)	No	0.9951
					siNups -AurBi (column 3) vs siNups + AurBi (column 4)	Yes	0.0086
				Figure 3C	siCon (black series) vs siNups (blue series)	Yes	<0.0001
				Figure 3E	siCon pppCHMP4C (column 1) vs siNups pppCHMP4C (column 2)	Yes	<0.0001
					siCon pAurB (column 3) vs siNups pAurB (column 4)	Yes	<0.0001
					siCon CHMP4B (column 5) vs siNups CHMP4B (column 6)	Yes	<0.0001
				Figure 3-supplement 1G	pCHMP4C siCon 11h Double Ring (column 1) vs siNups 11h Double ring (column 2)	No	0.823
					pCHMP4C siCon 16h Double Ring (column 3) vs siNups 11h Double Ring (column 4)	No	0.954
					pCHMP4C siCon 11h Flemming Ring (column 1) vs siNups 11h Flemming Ring (column 2)	No	0.9902
					pCHMP4C siCon 16h Flemming Ring (column 3) vs siNups 16h Flemming Ring (column 4)	No	0.5718
					pCHMP4C siCon 11h Disordered (column 1) vs siNups 11h Disordered (column 2)	No	0.9981
					pCHMP4C siCon 16h Disordered (column 3) vs siNups 16h Disordered (column 4)	No	0.6516
					pCHMP4C siCon 11h Absent (column 1) vs siNups 11h Absent (column 2)	No	0.9797
					pCHMP4C siCon 16h Absent (column 3) vs siNups 16h Absent (column 4)	No	0.9902
				Figure 3-supplement 1G	pppCHMP4C siCon 11h Double Ring (column 1) vs siNups 11h Double ring (column 2)	No	0.9898
					pppCHMP4C siCon 16h Double Ring (column 3) vs siNups 11h Double Ring (column 4)	Yes	0.0002
					pppCHMP4C siCon 11h Flemming Ring (column 1) vs siNups 11h Flemming Ring (column 2)	No	0.5513
					pppCHMP4C siCon 16h Flemming Ring (column 3) vs siNups 16h Flemming Ring (column 4)	Yes	0.001
					pppCHMP4C siCon 11h Disordered (column 1) vs siNups 11h Disordered (column 2)	No	0.8686
					pppCHMP4C siCon 16h Disordered (column 3) vs siNups 16h Disordered (column 4)	No	0.9756
					pppCHMP4C siCon 11h Absent (column 1) vs siNups 11h Absent (column 2)	No	0.994
					pppCHMP4C siCon 16h Absent (column 3) vs siNups 16h Absent (column 4)	No	0.994
				Figure 3-supplement 2B	one-way ANOVA comparing all columns	No	0.2648
				Figure 4F	DMSO (column 1) vs DYRK3i (column 2)	Yes	0.0065
					DMSO (column 1) vs CLK1i (column 3)	Yes	0.0361
				Figure 4G	DMSO (column 1) vs DYRK3i (column 2)	Yes	<0.0001
					DMSO (column 1) vs CLK1i (column 3)	Yes	<0.0001
				Figure 4H	EV siCon (column 1) vs EV siNups (column 2)	Yes	<0.0001
					EV siNups (column 2) vs CLK1 siNups (column 3)	Yes	0.0013
				Figure 4I	EV siNups (column 1) vs CLK1 siNups (column 2)	Yes	0.0128
				Figure 4-supplement 3B	DMSO 13h vs DYRK3i 1µm 13h	No	0.8628
					DMSO 13h vs CLK1i 1µm 13h	No	0.9939
					DMSO 14h vs DYRK3i 1µm 14h	Yes	0.0086
					DMSO 14h vs CLK1i 1µm 14h	Yes	0.0131
					DMSO 15h vs DYRK3i 1µm 15h	Yes	0.0025
					DMSO 15h vs CLK1i 1µm 15h	Yes	0.0004
					DMSO 16h vs DYRK3i 1µm 16h	Yes	0.0126
					DMSO 16h vs CLK1i 1µm 16h	Yes	0.0044
					DMSO 17h vs DYRK3i 1µm 17h	Yes	0.0214
					DMSO 17h vs CLK1i 1µm 17h	Yes	0.0466
					DMSO 18h vs DYRK3i 1µm 18h	No	0.676
					DMSO 18h vs CLK1i 1µm 18h	No	0.6921
				Figure 4-supplement 3C	(Early) DMSO 15h (column 1) vs DYRK3i 15h (column 2)	Yes	0.0064
					(Early) DMSO 15h (column 1) vs CLK1i 15h (column 3)	No	0.0622
					(Early) DMSO 16h (column 4) vs DYRK3i 16h (column 5)	No	0.1009
					(Early) DMSO 16h (column 4) vs CLK1i 16h (column 6)	Yes	0.0063
					(All) DMSO 15h (column 1) vs DYRK3i 15h (column 2)	No	0.9713
					(All) DMSO 15h (column 1) vs CLK1i 15h (column 3)	No	0.9486
					(All) DMSO 16h (column 4) vs DYRK3i 16h (column 5)	No	>0.9999
					(All) DMSO 16h (column 4) vs CLK1i 16h (column 6)	No	0.7788
				Figure 4-supplement 3D	(Early) DMSO 15h (column 1) vs DYRK3i 15h (column 2)	Yes	0.0151
					(Early) DMSO 15h (column 1) vs CLK1i 15h (column 3)	No	0.0671
					(Early) DMSO 16h (column 4) vs DYRK3i 16h (column 5)	No	0.6212
					(Early) DMSO 16h (column 4) vs CLK1i 16h (column 6)	Yes	0.0023
					(All) ANOVA all comparisons	No	0.3091
				Figure 4-supplement 4A	EV siCon (column 1) vs EV siNups (column 2)	Yes	<0.0001
					EV siNups (column 2) vs CLK1 siNups (column 3)	No	0.312
				Figure 4-supplement 4B	EV siNups (column 1) vs CLK1 siNups (column 2)	Yes	0.0099
				Figure 5C	siCon pAurB (column 1) vs siNups pAurB (column 2)	Yes	<0.0001
					siCon SC35 (column 3) vs siNups SC35 (column 4)	Yes	<0.0001
				Figure 5D	(pAurB) siCon/siCon (column 1) vs siNups/siCon (column 2)	Yes	<0.0001
					(pAurB) siCon/si4C (column 3) vs siNups/si4C (column 4)	Yes	<0.0001
					(pAurB) siCon/siCon (column 1) vs siCon/si4C (column 3)	No	0.982
					(pAurB) siNups/siCon (column 2) vs siNups/si4C (column 4)	Yes	0.0004
					(SC35) siCon/siCon (column 1) vs siNups/siCon (column 2)	Yes	<0.0001
					(SC35) siCon/4C (column 3) vs siNups/si4C (column 4)	Yes	0.0006
					(SC35) siCon/siCon (column 1) vs siCon/si4C (column 3)	No	0.9895
					(SC35) siNups/siCon (column 2) vs siNups/si4C (column 4)	Yes	0.0015
				Figure 5-supplement 1B	DMSO 12h (black) vs 12h Aphidicolin (red)	Yes	<0.0001
					DMSO 14h (black) vs 14h Aphidicolin (red)	No	0.2964
					DMSO 16h (black) vs 16h Aphidicolin (red)	Yes	0.001
					DMSO 18h (black) vs 18 h Aphidicolin (red)	No	0.0834
				Figure 5-supplement 1C	DMSO (column 1) vs Aphidicolin (column 2)	Yes	<0.0001
				Figure 5-supplement 1E	DMSO 12h (black) vs 12h Aphidicolin (red)	Yes	<0.0001
					DMSO 14h (black) vs 14h Aphidicolin (red)	No	0.1092
					DMSO 16h (black) vs 16h Aphidicolin (red)	No	0.4878
					DMSO 18h (black) vs 18h Aphidicolin (red)	No	0.9996
				Figure 5-supplement 1G	DMSO 12h (column 1) vs 12h Aphidicolin (column 2)	Yes	<0.0001
					DMSO 14h (column 3) vs 14h Aphidicolin (column 4)	Yes	<0.0001
					DMSO 16h (column 5) vs 16h Aphidicolin (column 6)	Yes	<0.0001
					DMSO 18h (column 7) vs 18h Aphidicolin (column 8)	Yes	<0.0001
				Figure 5-supplement 2A	Low Tension (column 1) vs High Tension (column 2)	Yes	0.0009
				Figure 5-supplement 2B	Low Tension (column 1) vs High Tension (column 2)	Yes	0.0217
				Figure supplement 2D	(Early) Low Tension (column 1) vs High Tension (column 2)	Yes	0.0077
					(All) Low Tension (column 1) vs High Tension (column 2)	Yes	0.046
				Figure 5-supplement 3B	siCon (column 1) vs siNups (column 2)	Yes	<0.0001
					Con (column 3) vs Bridge (column 4)	No	0.3828
				Figure 5-supplement 3D	(Early) Con (column 1) vs Bridge (column 2)	No	0.75
					(All) Con (column 1) vs Bridge (column 2)	No	0.8
				Figure 5-supplement 4A	siCon (lane 1) vs siNups (lane 2)	Yes	<0.0001
				Figure 5-supplement 4C	(Early) siCon 11h (black) vs siNups 11h (blue)	Yes	0.0019
					(Early) siCon 12h (black) vs siNups 12h (blue)	No	0.0627
					(Early) siCon 13h (black) vs siNups 13h (blue)	Yes	0.0122
					(Early) siCon 14h (black) vs siNups 14h (blue)	No	0.2879
					(All) siCon 11h (black) vs siNups 11h (blue)	No	0.1136
					(All) siCon 12h (black) vs siNups 12h (blue)	No	0.2151
					(All) siCon 13h (black) vs siNups 13h (blue)	No	>0.9999
					(All) siCon 14h (black) vs siNups 14h (blue)	No	0.1696
				Figure 6C	(SC35) siCon/siCon (column 1) vs siNups/siCon (column 2)	Yes	<0.0001
					(SC35) siCon/siALIX (column 3) vs siNups/siALIX (column 4)	Yes	<0.0001
					(SC35) siCon/siCon (column 1) vs siCon/siALIX (column 3)	No	0.9161
					(SC35) siNups/siCon (column 2) vs siNups/siALIX (column 4)	No	0.4226
					(pAurB) siCon/siCon (column 1) vs siNups/siCon (column 2)	Yes	<0.0001
					(pAurB) siCon/ALIX (column 3) vs siNups/siALIX (column 4)	Yes	<0.0001
					(pAurB) siCon/siCon (column 1) vs siCon/siALIX (column 3)	No	>0.9999
					(pAurB) siNups/siCon (column 2) vs siNups/siALIX (column 4)	No	0.9058
				Figure 6D	(SC35) siCon (column 1) vs siALIX (column 2)	Yes	<0.0001
					(pAurB) siCon (column 3) vs siALIX (column 4)	Yes	<0.0001
				Figure 6E	ACB Absent 12h (column 1) vs ACB Present 12h (column 2)	Yes	<0.0001
					ACB Absent 14h (column 3) vs ACB Present 14h (column 4)	Yes	<0.0001
					ACB Absent 16h (column 5) vs ACB Present 16h (column 6)	Yes	<0.0001
				Figure 6-supplement 1B	siCon siCon (column 1) vs siCon siNups (column 2)	No	>0.9999
					siCon siCon (column 1) vs siALIX siCon (column 3)	Yes	0.0011
					siCon siNups (column 2) vs siALIX siNups (column 4)	No	0.1706
					siALIX siCon (column 3) vs siALIX siNups (column 4)	Yes	0.0236
				Figure 6-supplement 1D	(SC35) siCon (column 1) vs siALIX (column 2)	Yes	0.00043
					(pAurB) siCon (column 3) vs siALIX (column 4)	Yes	<0.0001
				Figure 6-supplement 2B	siCon (column 1) vs siALIX (column 2)	Yes	<0.0001
				Figure 6-supplement 2D	siCon (column 1) vs siALIX (column 2)	No	0.9999
